1 **Transcriptomic mapping of the metzincin landscape in human trophoblasts**

2  
3 Jasmin Wächter<sup>1,2</sup>, Matthew J Shannon<sup>1,2</sup>, Barbara Castellana<sup>1,2</sup>, Jennet Baltayeva<sup>1,2</sup>, Alexander G.  
4 Beristain<sup>1,2</sup>

5  
6  
7 <sup>1</sup>The British Columbia Children’s Hospital Research Institute, Vancouver, Canada.

8 <sup>2</sup>Department of Obstetrics & Gynecology, The University of British Columbia, Vancouver, Canada.  
9

10  
11  
12 To whom correspondence should be addressed: Alexander G. Beristain, The British Columbia Children’s  
13 Hospital Research Institute, The University of British Columbia, Vancouver, British Columbia, Canada. V5Z  
14 4H4. Tel: (604) 875-3573; E-mail: [aberista@mail.ubc.ca](mailto:aberista@mail.ubc.ca)

15  
16  
17  
18  
19 **Running Title:** The metalloprotease landscape in human trophoblasts

20  
21  
22  
23  
24 **Keywords:** Placenta, trophoblast, protease, metzincin protease, matrix metalloprotease, progenitor, single  
25 cell RNA sequencing, differentiation, organoids, ADAM metalloprotease With Thrombospondin Type 1  
26 Motif 6, Fibrillin 2  
27  
28

29 **Summary Statement:** Single cell RNA sequencing characterizes the expression of multiple metzincin  
30 proteases within first trimester placental trophoblasts. Examination of protease-substrate interactions within  
31 cytotrophoblasts identifies potential interactions between ADAMTS6 and FBN2.

32

33 **Highlights:**

- 34 • Single cell RNA sequencing identifies 24 distinct metzincin proteases expressed in human first  
35 trimester trophoblasts
- 36 • Lineage trajectory modelling shows that metzincin genes are dynamic and likely control processes in  
37 progenitor, mid-point, and end-point states of trophoblast differentiation.
- 38 • ADAMTS6, and its putative substrate FBN2, localize specifically to progenitor trophoblasts

39

40 **Abbreviations**

41 CTB: Cytotrophoblast

42 DCT: Distal column trophoblast

43 DGE: Differential gene expression

44 EVT: Extravillous trophoblast

45 GO: Gene ontology

46 HLA-G: Human leukocyte antigen G

47 IF: Immunofluorescence

48 scRNA-seq: single cell RNA sequencing

49 SCT: Syncytiotrophoblast

50 UMAP: Uniform manifold approximation and projection

51 ADAM: A disintegrin and metalloproteinase

52 MMP: Matrix metalloprotease

53 ADAMTS: A disintegrin and metalloproteinase with thrombospondin motifs

54 ECM: Extracellular cell matrix

55 EGFR: Epidermal growth factor receptor

56

57

58

59

60

61

62

63

64

65 **ABSTRACT**

66 The metzincin family of metalloproteases coordinates cell and tissue developmental processes through  
67 regulation of growth factor availability, receptor signaling, and cell-cell/cell-matrix adhesion. During  
68 placental development, while distinct roles for metzincin proteases in controlling specific trophoblast  
69 functions have been described, a comprehensive assessment of metzincins during discrete stages of  
70 trophoblast differentiation has yet to be performed. Here we provide a comprehensive single cell  
71 transcriptomic resource of metzincin protease expression in diverse states of human trophoblasts from first  
72 trimester placental and decidual tissues. In the 8 distinct trophoblasts states categorized [four progenitor  
73 cytotrophoblast (CTB), one syncytiotrophoblast precursor (SCTp), two column CTB (cCTB), and one  
74 extravillous trophoblast (EVT) state], we identified 24 metzincin genes. These included 12 adamalysins, 2  
75 pappalysins, 3 astacins and 7 matrixins. Cell trajectory modeling shows that expression of most (19/24)  
76 metzincins increases across CTB to EVT differentiation, though select proteases also increase as CTB fuse  
77 into syncytiotrophoblast. Within the CTB niche, single-cell velocity ordering identified 11 metzincins  
78 (*ADAM10*, *-17*, *MMP14*, *-15*, *-19*, *-23B*, *ADAMTS1*, *-6*, *-19*, *TLL-1*, *-2*) expressed in progenitors proximal to  
79 the predicted origin. Analysis of metzincin-substrate interactions within the CTB niche revealed ~150  
80 substrates and binding partners, including *FBN2* as an *ADAMTS6*-specific substrate preferentially expressed  
81 in trophoblast progenitors. Together, this work characterizes the metzincin transcriptomic landscape in  
82 human first trimester trophoblasts and establishes insight into the roles specific proteases perform within  
83 distinct trophoblast niches and across differentiation. This resource serves as a guide for future investigations  
84 into the roles of metzincin proteases in human placental development.

## 85 **INTRODUCTION**

86 The placenta is a transient organ that develops during pregnancy and serves as a physiological link  
87 between the developing fetus and mother. Multiple processes are coordinated by the placenta, where cross-  
88 species similarities in function amongst placental mammals are generally conserved [1]. For example, the  
89 placenta facilitates nutrient and waste exchange between fetal and maternal systems, produces key hormones  
90 and growth factors required for pregnancy maintenance, and modulates the maternal immune system to  
91 tolerate the semi-allogeneic fetus and placenta [2,3]. Therefore, it may come as no surprise that abnormal  
92 placentation is a confounding feature of many pregnancy disorders [4–6]. Central to many of the placenta’s  
93 functions are the trophoblast-derived trophoblasts.

94 In humans, trophoblast progenitors, termed cytotrophoblast (CTB), differentiate along two major cell  
95 pathways: villous and extravillous [3,7]. CTB reside within the inner trophoblast layer of floating villi or  
96 proximal to areas of placental-uterine attachment. In floating villi, CTB proliferate and fuse with neighboring  
97 CTB to generate an overlying multinucleated structure called the syncytiotrophoblast (SCT), representing the  
98 main site of physiological exchange between fetal and maternal circulations and the major endocrine engine  
99 of the placenta [2]. Alternatively, CTB proximal to placental-uterine attachment points proliferate and  
100 expand to form multilayered columns of cells called column CTB (cCTB). As cCTB mature, epithelial  
101 characteristics (i.e., tight cell-cell adhesions) are gradually lost and replaced with mesenchymal-like features  
102 (i.e., reduced homotypic adherence, acquisition of mesenchymal molecular programs) [8,9]. At distal ends of  
103 anchoring columns, cCTB detach and invade into the maternal compartment where they are now considered  
104 terminally differentiated extravillous trophoblast (EVT) [3]. EVT are highly motile and invade/migrate into  
105 uterine arteries, veins, and lymphatics, and in doing so play central roles in coordinating uterine vascular  
106 remodeling and tempering the maternal immune system [10]. While these invasive features of EVT are not  
107 dissimilar from invasive/metastatic cancer cells, EVT invasion is a highly regulated process that is  
108 coordinated in part by soluble factors produced by cells of the decidualized endometrium.

109 Metzincin metalloproteases are a diverse family of proteases defined by the presence of a methionine  
110 residue at the active/regulatory site and the incorporation of a zinc ion within the active site that is necessary  
111 for enzymatic reactivity [11,12]. Metzincin metalloproteases are comprised of matrix metalloprotease  
112 (MMP), a disintegrin and metalloprotease (ADAM), ADAM with thrombospondin repeat (ADAMTS),  
113 astacins, snapalysin, serralysin, leishmanolysin and pappalysin subfamilies. The importance of metzincin  
114 proteases is underlined by key roles of MMPs in tissue morphogenesis (i.e. tadpole tale resorption; [13]) and  
115 their involvement in chronic diseases like arthritis and cancer [14,15]. Twenty-four MMPs, twenty-one  
116 ADAMs, nineteen ADAMTS, six astacins, and two pappalysins are present in the human genome, and  
117 together play diverse roles in extracellular matrix remodeling/degradation [16], receptor/ligand activation  
118 and availability [11], and the control of cell-cell and cell-matrix interactions [17].

119 The diverse biological processes regulated by metzincin metalloproteases suggest that they may play  
120 central roles in placentation, and in particular, trophoblast development and function. Indeed MMP-directed  
121 matrix degradation controls EVT invasion [18,19], while ADAM-controlled cell-matrix and cell-cell

122 processes play roles in promoting anchoring villi outgrowth and EVT motility [20,21], as well as SCT  
123 formation [22]. More recently in other systems, the importance of metalloproteases in controlling the  
124 availability of soluble factors in defined cell niches suggests that protease-controlled events may regulate  
125 stem cell and lineage fate decisions during tissue/organ development [23,24]. However, it is not currently  
126 known if metzincin proteases play roles in CTB progenitor maintenance or downstream sub-lineage  
127 commitments.

128 Advances in single cell transcriptomics allow for unprecedented examination of cell heterogeneity,  
129 cellular hierarchy, and gene pathways central to stem cell maintenance and the control of differentiation. In  
130 this work, we use published single cell RNA sequencing (scRNA-seq) datasets [25,26] to define the  
131 metzincin protease landscape of human trophoblasts in early pregnancy. We show that human trophoblasts  
132 express 24 metzincin proteases. Bioinformatic cell lineage modeling describes metzincin protease kinetics  
133 during SCT and EVT differentiation, and importantly sheds light on the importance of six proteases  
134 (*ADAMTS6*, *ADAMTS19*, *ADAM10*, *ADAM17*, *MMP14*, and *MMP15*) as well as their putative substrates in  
135 the CTB progenitor niche. Together, this work defines the metalloprotease transcriptomic landscape in early  
136 human trophoblast development. Importantly, this work also provides detailed insight and a comprehensive  
137 resource for understanding the role of metzincin proteases in shaping the CTB progenitor niche.

138

139 **MATERIALS AND METHODS:**

140 **Patient recruitment and tissue collection**

141 Placental tissues were obtained with approval from the Research Ethics Board on the use of human  
142 subjects, University of British Columbia (H13-00640). All samples were collected from pregnant individuals  
143 (19 to 39 years of age) providing written informed consent undergoing elective terminations of pregnancy at  
144 British Columbia's Women's Hospital, Vancouver, Canada. First trimester placental tissues ( $n=3$ ) were  
145 collected from participating pregnant individuals (gestational ages ranging from 6–12 weeks) having  
146 confirmed viable pregnancies by ultrasound-measured fetal heartbeat. Patient clinical characteristics i.e.,  
147 height and weight were additionally obtained to calculate body mass index (BMI:  $\text{kg}/\text{m}^2$ ). All consenting  
148 pregnant individuals provided self-reported information via questionnaire to having first-hand exposure to  
149 cigarette smoke or taken anti-inflammatory or anti-hypertensive medications during pregnancy. Patient and  
150 sample phenotype metadata are described in Supplemental Table 4.

151

152 **Placental tissue single cell RNA-seq library construction**

153 *Data Repository Integration:* Droplet-based first trimester scRNA-seq decidual ( $n=4$ ) and placental  
154 tissue ( $n=11$ ) data was obtained from the public repository ArrayExpress (E-MTAB-6701) [25] and from the  
155 GEO repository (GSE174481) [26]. Data was integrated and sample specific metrics are summarized as in  
156 Shannon *et al.* [26].

157

158 **Single cell RNA-seq data analysis**

159 Code used for all subsequent data processing and analyses are available at:  
160 <https://github.com/JasminWaechter> and <https://github.com/MatthewJShannon>.

161

162 *Data pre-processing and quality control:* A total of 50,790 single cells from maternal-fetal interface samples  
163 were sequenced and pre-processed using the Seurat R package (version 4.0.1) [27,28]. Quality control, cell  
164 cycle scoring, scaling, normalization, removal of doublets and integration was done as previously described  
165 in Shannon *et al.* [26].

166

167 *Cell clustering, identification, and trophoblast sub-setting:* Cell clustering, trophoblast identification, and  
168 subsequent filtering for trophoblasts was done identically as described in Shannon *et al.* [26]. Trophoblasts  
169 were subset and re-clustered in Seurat at a resolution of 0.375 using 50 principal components. Trophoblast  
170 projections were visualized as Uniform Manifold Approximation and Projections (UMAPs).

171

172 *Protease Identification:* Expression of all known metzincin proteases was examined in trophoblasts.  
173 Proteases were considered significantly expressed when either showing expression in 1% of all cells or 5%  
174 of cells in a specific cluster. Similar thresholds have been used elsewhere [29][30].

175

176 *Pseudotime*: The Monocle2 R package (version 2.18.0) [31–33] was used to explore the differentiation of  
177 progenitor CTB into specialized SCT and EVT. The trophoblast raw counts were loaded into Monocle2 for  
178 semi-supervised single cell ordering across a pseudotime vector, using *BCAM* and *EGFR* expression to  
179 denote cells at the origin and *HLA-G* and *ITGA5*, as well as *ERVFRD-1* and *ERVV-1* gene expression to  
180 indicate progress towards EVT and SCT, respectively. Branched expression analysis modelling (BEAM) was  
181 applied to observe the expression of the 24 identified proteases over pseudotime, progressing towards either  
182 EVT or SCT. Results were visualized using the “plot\_cell\_trajectory” and the  
183 “plot\_genes\_branched\_pseudotime” functions. To further confirm trophoblast differentiation trajectories, the  
184 Monocle3 package version 1.1.0 [34] was used as described in Shannon *et al.* [26].

185

186 *Lineage Trajectory*: Identical to Shannon *et al.* [26], sample-specific count matrices of unspliced, spliced,  
187 and ambiguous RNA transcript abundances were generated using the Velocity package [35] and merged  
188 with their corresponding 10X sample using velocity.R (version 0.6). The final, processed trophoblast object  
189 and UMAP embeddings were exported to a Jupyter Notebook and the scVelo Python package [36] was used  
190 to read, prepare, and recover holistic trophoblast gene splicing kinetics using the 2000 most differentially  
191 expressed genes. Velocities were projected on top of the extracted UMAP embeddings generated in Seurat.

192

193 *Differential gene expression*: Differential expression (DEG) analyses were performed in Seurat using the  
194 “FindMarkers” function using a MAST [37] framework on the raw count data. Ident.1 was set to CTB1-4.  
195 Parameters included a minimum log fold-change difference between groups of “-INF”, a minimum gene  
196 detection of “-INF” in cells in each group, and a minimum difference in the fraction of detected genes  
197 within each group of “-INF”, allowing all genes to be compared. Results were visualized using the R  
198 package EnhancedVolcano (version 1.8.0), with a fold-change cut-off of >0.5 and a p value cut-off of <10e-4  
199 as the thresholds for significance.

200

201 *Protease – Substrate Analysis*: The NicheNet package [38] was used to examine protease-substrate and  
202 protease-binding partner interactions. Additional interactions and substrates taken from the literature were  
203 added to the existing NicheNet-curated database. Their respective sources and experimental evidences are  
204 shown in Supplemental Table 3. To build the updated “ligand-target-matrix”, new data points were given a  
205 source weight of 1 to provide a strong contribution in the final model. Afterwards, data sources were  
206 aggregated using “construct\_weighted\_networks”. Source weights were optimized using  
207 “apply\_hub\_corrections” and finally, the “ligand-target matrix” was built using  
208 “construct\_ligand\_target\_matrix”. For the analysis, both receiver and sender cells were denoted as CTB1-4.  
209 Proteases expressed in 20% of CTB were selected as “ligands”. Substrates and binding partners expressed in  
210 20% of CTB were considered for the analysis. Several sources including gene regulatory information, cell  
211 signaling databases, phosphorylation network, kinase-substrate information and indirect interaction were

212 excluded from the protease-substrate interaction analysis. Information regarding exclusion of sources is  
213 described in Supplemental Table 2. The resulting protease-substrate interactions were visualised using the  
214 “vis\_ligand\_receptor\_network” function. Literature curated substrates (blue) and interactions (lime green)  
215 are marked. Specific signaling pathways were extracted using “get\_ligand\_signaling\_path”. All data sources  
216 were included for the aforementioned follow-up analysis. The percentage of cells in CTB 1-4 expressing  
217 each gene in the extracted signalling pathway was manually added as a colour scale (red).

218  
219 *Gene ontology*: GO analysis of expressed genes encoding identified substrates and interactions was  
220 performed using the clusterProfiler R package (version 3.18.1) [39] function “enrichGO” and visualized  
221 using the “goplot” function. Specific FBN2 pathways were examined using the ReactomePA package  
222 (version 1.36.0) [40]. The “Elastic fibre formation” pathway was highlighted.

223

## 224 **Immunofluorescence microscopy**

225 Placental villi (6-12 weeks’ gestation;  $n=3$ ) were fixed in 2% paraformaldehyde overnight at 4°C.  
226 Tissues were paraffin embedded and sectioned at 6  $\mu\text{m}$  onto glass slides. Immunofluorescence was  
227 performed as previously described [41]. Briefly, placental tissues underwent antigen retrieval by heating  
228 slides in a microwave for 5 X 2-minute intervals in 10mM citrate buffer (pH 6.0). Sections were incubated  
229 with sodium borohydride for 5 minutes at room temperature (RT), followed by Triton X-100  
230 permeabilization for 5 minutes, RT. Slides were blocked in 5% normal goat serum/0.1% saponin for 1 hr,  
231 RT, and incubated with combinations of the indicated antibodies overnight at 4 °C: mouse monoclonal anti-  
232 HLA-G (clone 4H84; 1:100; Exbio); rabbit monoclonal anti-cytokeratin 7 (clone SP52; 1:50; Ventana  
233 Medical Systems), rabbit polyclonal anti-EGFR (D38B1) (1:50; clone: 4267; Cell signalling), rabbit  
234 polyclonal anti-ADAM-17 (1:100; ab19027; Abcam), mouse monoclonal anti-hCG beta (clone 5H4-E2;  
235 1:100; Abcam), purified rabbit polyclonal isotype ctrl (1:100; clone: 910801; Biolegend)

236 Following overnight incubation, sections and coverslips were washed with PBS and incubated with  
237 Alexa Fluor goat anti-rabbit 568 and goat anti-mouse 488 conjugated secondary antibodies (Life  
238 Technologies, Carlsbad, CA) for 1 hr at RT, washed in PBS and mounted using ProLong Gold mounting  
239 media containing DAPI (Life Technologies). Slides were imaged with an AxioObserver inverted microscope  
240 (Carl Zeiss, Jena, Germany) using 20X Plan-Apochromat/0.80NA or 40X Plan-Apochromat/1.4NA  
241 objectives (Carl Zeiss). An ApoTome .2 structured illumination device (Carl Zeiss) set at full Z-stack mode  
242 and 5 phase images were used for image acquisition. Patient and sample phenotype metadata are described in  
243 Supplemental Table 4.

244

## 245 **Mean fluorescent intensity measurements**

246 Ten snapshots of HLA-G expressing anchoring villi were taken for each placenta ( $n=3$ ). Analyses  
247 were performed in ImageJ (version 2.0.0). For each image, background was subtracted. Sections were



248 visually divided into proximal column, medial column, and distal column based on HLA-G expression  
249 intensity. Mean values from each section were measured. These values were then divided by the mean  
250 intensity value of the whole image.

251

## 252 **RNAscope**

253 Placental villi (6-12 weeks' gestation;  $n=2$ ) were fixed in 2% paraformaldehyde overnight at 4°C.  
254 Tissues were paraffin embedded and sectioned at 6  $\mu\text{m}$  onto glass slides. The RNAscope 2.5HD Duplex  
255 Assay (ACD Bio) was performed according to manufacturer's instructions. The Hs-FBN2-C2-*Homo sapiens*  
256 fibrillin 2 mRNA (Cat#1075921-C2, ACD bio) probe and the Hs-ADAMTS6-*Homo sapiens* ADAM  
257 metalloproteinase with thrombospondin type 1 motif 6 mRNA (Cat#814831) were used. Slides were imaged  
258 with an Olympus upright microscope (Olympus corporation, Japan) using 20X Plan-Apochromat/0.80NA or  
259 40X Plan-Apochromat/1.4NA objectives (Olympus Corporation, Japan). Patient and sample phenotype  
260 metadata are described in Supplemental Table 4.

261

## 262 **Statistical analysis**

263 Mean fluorescent intensity data are reported as median values with standard deviations. All  
264 calculations were carried out using R software. Measurements were examined for normality using the  
265 Shapiro-Wilks test. The homogeneity of variance was examined using the Levene's Test. Outliers were  
266 removed. One-way ANOVA followed by Tukey post-test were performed for all other measurements. The  
267 differences were accepted as significant at  $P < 0.05$ .

## 268 **RESULTS**

### 269 **The metzincin protease landscape within transcriptionally-defined trophoblast states**

270 Single cell transcriptomics (scRNA-seq) enables the identification of cellular heterogeneity and  
271 hierarchy within complex tissues and organs. Moreover, scRNA-seq allows for the comprehensive analysis  
272 of gene profiles at single cell resolution. Recently, we established scRNA-seq libraries from seven unique  
273 first trimester chorionic villus tissues [26] and integrated these data with a publicly available scRNA-seq  
274 dataset consisting of chorionic villus ( $n=4$ ) and decidual ( $n=4$ ) specimens [25]. Using these published  
275 datasets, we set out to comprehensively examine the metzincin protease transcriptomic landscape in human  
276 trophoblasts. Implementing our previously described single cell dataset filtering and analysis pipeline [26],  
277 7,798 trophoblasts originating from chorionic villi and decidua were subset from non-trophoblast cells and  
278 resolved into transcriptionally-defined clusters that identify unique trophoblast states (Fig. 1A).  
279 Recapitulating our previous findings [26], eight cell states were resolved, and by referencing known  
280 trophoblast marker genes, four CTB (CTB1-4;  $TEAD^+$ ,  $EGFR^+$ ), one syncytiotrophoblast precursor (SCTp;  
281  $ERVFRD-1^+$ ), two column CTB (cCTB1-2;  $ITGA5^+$ ,  $NOTCH1^+$ ), and one EVT state ( $HLA-G^+$ ,  $ITGA1^+$ )  
282 were characterized (Fig. 1A; Fig. S1A, S1B).

283 To map metzincin protease gene signatures within these defined trophoblast states, a trophoblast  
284 state-based expression analysis of genes encoding human MMPs, astacins, ADAMs, ADAMTSs, and  
285 pappalysins, as well as inhibitors to these proteases, was performed (complete list of metzincin genes is  
286 shown in Table S1). Only metzincin genes expressed in  $\geq 1\%$  of cells across all 8 states or in  $\geq 5\%$  of cells  
287 within one specific state were selected for downstream analyses; this level of stringency accounts for the  
288 stochastic nature of scRNA-seq technologies and allows for the capture of proteases expressed in specific  
289 trophoblast sub-states as well as those expressed broadly across multiple states. Similar thresholds have been  
290 used elsewhere [30][29]. Using these parameters, we identified 24 metzincin proteases and 4 metalloprotease  
291 inhibitors in human first trimester trophoblasts with  $TEAD4$ ,  $ERVFRD1$ , and  $HLA-G$  serving as reference  
292 marker genes for CTB, SCTp, and cCTB/EVT states, respectively (Fig. 1B). Specifically, cluster-averaged  
293 levels of metzincin genes show multiple MMPs ( $MMP2$ , -3, -11, -14, -15, -19, -23B), ADAMs ( $ADAM8$ , -9,  
294 -10, -12, -15, -17, -19, -28), ADAMTSs ( $ADAMTS1$ , -6, -19, -20), pappalysins ( $PAPPA$ ,  $PAPPA2$ ), and  
295 astacins ( $TLL1$ ,  $TLL2$ ,  $BMP1$ ) to be expressed in first trimester trophoblasts (Fig. 1B). The four  
296 metalloprotease inhibitors  $TIMP1$ ,  $TIMP2$ ,  $TIMP3$ , and  $RECK$  are primarily confined to the EVT state and,  
297 to a lesser extent, the cCTB state (Fig. 1B). The majority of metzincin genes (19/24) are also preferentially  
298 expressed by invasive EVT (Fig. 1B; 1C). cCTB-1 and -2 states, developmentally upstream of EVT, likewise  
299 show broad expression of metzincin proteases, though levels are generally lower than those seen in EVT.  
300  $MMP19$  is the exception by showing the highest expression levels in the cCTB1 state (Fig. 1B).

301 Though CTB progenitor states do not show as extensive expression of metzincin genes, a subset of  
302 MMPs ( $MMP14$ , -15, -19, -23B), ADAMs ( $ADAM10$ ,  $ADAM17$ ), ADAMTSs ( $ADAMTS1$ , -6, -19), and  
303 astacins ( $TLL1$ ,  $TLL2$ ) are expressed at moderate levels within the CTB1-4 states (Fig. 1B; 1C).  
304 Additionally, within the SCTp state,  $MMP23B$ ,  $PAPPA2$ ,  $ADAM17$ ,  $BMP1$ , and  $TLL2$  are expressed by a

305 substantial number of cells (Fig. 1B; 1C). Because of the broad ubiquitous expression of *ADAM17* across  
306 multiple trophoblast states (Fig. 1C), we examined the localization of ADAM17 by immunofluorescence  
307 microscopy (IF) in a separate cohort of first trimester placentas (Fig. 2A). Consistent with the scRNA-seq  
308 findings, ADAM17 signal was detected in EGFR<sup>+</sup> CTB of floating chorionic villi and in HLA-G<sup>+</sup>  
309 trophoblasts located proximally and distally, within placental anchoring columns (Fig. 2A). Due to non-  
310 specific antibody signal in the multinucleated hCG<sup>+</sup> SCT (Fig. 2A; S2A), the strong immuno-labeling of  
311 ADAM17 within the outer SCT layer should be interpreted with caution. Nonetheless, quantification of the  
312 ADAM17 signal within the anchoring column showed that ADAM17 levels progressively increase along the  
313 EVT pathway, a finding consistent with our scRNA-seq analysis (Fig. 2B). ADAM17 signal was lowest in  
314 proximal anchoring column CTB and highest in HLA-G expressing distal column CTB (Fig. 2B). Overall,  
315 these findings capture the diversity of metzincin proteases expressed within trophoblast subtypes and distinct  
316 trophoblast states. Examples of proteases expressed within progenitor, in terminally differentiated EVT, and  
317 in SCT states are as well characterized at single cell resolution.

318

### 319 **Defining metzincin metalloprotease dynamics during trophoblast differentiation**

320 Efforts to understand the roles of metalloproteases in trophoblast biology have primarily focussed on  
321 their involvements in promoting invasive and migratory EVT processes. However, given that metzincin  
322 proteases control multiple processes important in cell regeneration and fate specification (via modulation of  
323 substrate/receptor activity and availability, as well as cell-cell / cell-matrix adhesion), we next set out to  
324 examine how metzincin protease dynamics align with specific cell differentiation trajectories. Using the  
325 combined scRNA-seq datasets described above, we recapitulated Monocle 2 and Monocle 3 pseudotime cell  
326 trajectory modelling previously described in Shannon et al [26]. Monocle 2 semi-supervised ordering  
327 revealed two differentiation trajectories originating within the CTB1-4 states and developing towards mature  
328 EVT and SCTp states, respectively (Fig 3A; Fig. S2B). By sub-setting the 24 metzincin protease genes  
329 expressed in trophoblasts and aligning their expression levels along pseudotime-derived cell trajectories, we  
330 show protease expression kinetics during SCT and EVT differentiation (Fig. 3B). Plotting known  
331 stem/progenitor cell (*CDX2*, *TEAD4*), trophoblast column (*NOTCH1*), and terminally differentiated EVT  
332 (*HLA-G*) and SCT (*ERVFRD-1*) genes along pseudotime shows that Monocle 2 correctly reconstructs the  
333 anticipated cell state ordering during EVT and SCT differentiation (Fig. 3B). Specifically, cells expressing  
334 high levels of *CDX2* localize to the predicted pseudotime origin, whereas *TEAD4* expressing cells  
335 proximally flank this origin along both the EVT and SCT differentiation branches; as expected, *TEAD4*  
336 levels gradually decrease as cells mature into EVT and SCT (Fig. 3B). *NOTCH1*, a gene thought to play a  
337 central role in EVT progenitor renewal [42], shows the highest expression in trophoblasts found midway  
338 along the EVT branch. Further, *HLA-G* and *ERVFRD-1*, genes associated with more mature EVT and SCT  
339 states, respectively, show elevated expression in trophoblasts nearing EVT and SCT ordering endpoints (Fig.  
340 3B). In summary, Monocle 2 pseudotime ordering recapitulates known transcriptomic events important in  
341 human trophoblast development.

342 Alignment of the 24 metzincin proteases identified as expressed in trophoblasts along the  
343 pseudotime trajectory shows that expression of most genes (19/24) predominately skews towards the EVT  
344 state (Fig. 3B). This is consistent with previous descriptions of metzincin proteases like *MMP2* [19],  
345 *MMP14* [43], and *ADAM12* [20,21] in controlling EVT invasion. Notably, the expression of proteases like  
346 *ADAM8*, *ADAM9*, and *BMP1* appear upstream of *HLA-G*-expressing EVT, suggesting that these genes play  
347 roles in column trophoblast and immature EVT development (Fig. 3B). By contrast, the expression of other  
348 proteases (i.e., *ADAM28*, *PAPPA*, *MMP2*, *MMP15*, *ADAM19*) occurs much later along the EVT trajectory,  
349 suggesting that these genes may have roles specific to mature EVT functions like uterine stroma extracellular  
350 matrix degradation and invasion (Fig. 3B). As CTB states transition into SCT precursors, levels of *TLL2*,  
351 *PAPPA2*, and *ADAM17* markedly increase, indicating that these proteases play roles in aspects of SCT  
352 formation (Fig. 3B). Notably, *ADAM17*, *BMP1*, *MMP3*, and *PAPPA2* show bimodal-like patterns, where  
353 expression levels increase in cells transitioning along both the EVT and SCT pathways, suggesting that these  
354 proteases play complex roles in placental development (Fig. 3B).

355 Proximal to the defined pseudotime origin, a subset of proteases is observed to be expressed in  
356 primitive trophoblast states (Fig. 3B). *MMP15*, *MMP23B*, *ADAMTS19*, and *TLL1* all show high expression  
357 in cells closely aligning to the pseudotime origin and co-expressing the trophoblast stem cell/progenitor gene  
358 marker, *CDX2* (Fig. 3B). *ADAMTS6* levels align most tightly with cells directly flanking the origin, a pattern  
359 similarly observed for *TEAD4* (Fig. 3B). Examining the kinetics of metalloprotease inhibitor expression  
360 along EVT and SCT trajectories show that *RECK*, *TIMP1*, and *TIMP2* levels are highest in cells aligning  
361 with EVT endpoint states (Fig. 3B). *TIMP3* levels, on the other hand, are highest at the origin and in cell  
362 states gradually progressing along the SCT trajectory (Fig. 3B). Together, this data highlights metzincin  
363 protease and inhibitor gene expression dynamics in human trophoblasts differentiating along the SCT and  
364 EVT pathways. These findings provide insight into possible functions and the developmental timing of  
365 specific proteases expressed across trophoblast regeneration and differentiation.

### 366 367 **Progenitor metzincin proteases and their kinetics within the CTB niche**

368 Progenitor CTB must undergo continual renewal and, when appropriate, commit to differentiation  
369 along either the SCT or EVT pathways. Within this CTB niche, little is known about the role metzincin  
370 proteases play. However, the scRNA-seq analyses described above identified 11 metzincin encoding genes  
371 expressed in the CTB1-4 states. To examine the kinetics of CTB-associated protease expression more  
372 closely, we applied RNA velocity (scVelo) [35], an algorithm that measures relative abundances of unspliced  
373 versus spliced mRNA transcripts to predict cellular state progression. In line with scVelo modeling  
374 performed previously on this dataset [26], a predicted origin overlapping with the CTB2 state was identified  
375 with multiple paths extending from this origin towards the CTB3, SCTp, and EVT states (Fig. 4A).  
376 Assessment of the key progenitor/stem cell-associated genes *TEAD4* and *CDX2* within UMAP projections  
377 shows their expression to be largely defined within CTB progenitor states, though *TEAD4* expression is most  
378 frequent within the proliferative *MKI67*<sup>+</sup> CTB4 state (Fig. 4B). Visualization of metzincin proteases

379 identifies three broad expression patterns: CTB-specific, ubiquitous, and bimodal/transient (Fig. 4C-E).  
380 Metzincins predominantly expressed in CTB progenitor states are *ADAMTS6*, *ADAMTS19*, *MMP23B*, and  
381 *TLL1*, where *ADAMTS6* and *ADAMTS19* are expressed at higher levels, and in more cells per CTB state,  
382 than *MMP23B* and *TLL1* (Fig. 4C). Proteases expressed ubiquitously across all states, including CTB, are  
383 *ADAM10*, *ADAM17*, *ADAMTS1*, *MMP14*, and *MMP19* (Fig. 4D). However, it is notable that while  
384 expression is observed in all trophoblast states, levels of *ADAM10*, *ADAMTS1*, *MMP14*, and *MMP19* are  
385 markedly higher in cells aligning with column CTB (cCTB1, cCTB2) and EVT states (Fig. 4D). Lastly,  
386 *TLL2* and *MMP15* show transient levels of expression as trophoblasts differentiate along the EVT and SCT  
387 pathways. *TLL2* levels are prevalent in trophoblasts aligning to the CTB origin and show elevation in the  
388 differentiated SCTp state (Fig. 4E). *MMP15* also shows a high frequency of expression in origin-associated  
389 trophoblast states but this differs from *TLL2* with *MMP15* being more highly expressed in terminally  
390 differentiated EVT (Fig. 4E). Together, this data identifies specific metzincin protease genes expressed  
391 within CTB states and illustrates how levels of these genes change within unique CTB states and along SCT  
392 and EVT pathways.

393

#### 394 **Mapping the metzincin-substrate landscape within the CTB niche**

395 Our finding that multiple metzincin proteases are preferentially expressed within progenitor CTB  
396 sheds light into the possible roles these metalloproteases play in trophoblast progenitor renewal and the early  
397 steps of trophoblast differentiation. To investigate the biological functions controlled by metzincins within  
398 the CTB niche, we set out to examine enzyme-substrate interactions. Focussing on only metzincin genes  
399 expressed in  $\geq 20\%$  of CTB (so as to improve interpretability of protease-substrate relationships, as  
400 performed in other studies [44]); we restricted our analyses to *ADAM10*, *ADAM17*, *ADAMTS6*, *ADAMTS1*,  
401 *MMP14*, and *MMP15*. We used the NicheNet package which combines dataset-specific gene expression data  
402 with existing knowledge on ligand-receptor, signaling, and gene regulatory networks. Since our analysis  
403 focussed solely on direct protease interactions with substrates and other binding partners, we excluded data  
404 sources containing downstream gene regulatory information, indirect interactions, phosphorylation events,  
405 and kinase-substrate interactions (Table S2). We further manually added verified protease-substrate  
406 interactions specific to *ADAM10*, *ADAM17*, *ADAMTS6*, *ADAMTS1*, *MMP14*, and *MMP15* in response to the  
407 non-exhaustive nature of the NicheNet curated directory (Table S3).

408 From the protease-substrate interaction list, only genes encoding substrates expressed in  $\geq 20\%$  of  
409 CTB were selected. In total, 154 potential protease-substrate pairs are identified in the CTB niche (Fig. 5A)  
410 (Table S3). Not surprising, substrates common to both *ADAM10* and *ADAM17* are identified, including  
411 *ITGB1*, *CDH1*, *APP* and *EGFR* (Fig. 5A). Interaction potential scoring highlights *PTPN3* (tyrosine  
412 phosphatase), *TNFRSF1A*, and *MAD2L1* as the substrates most strongly interacting with *ADAM17* (Fig. 5A).  
413 *ADAM10*, on the other hand, shows interaction with *MET*, *DLG1*, *ITM2B*, and *B3GNT2* within the CTB1-4  
414 states (Fig. 5A). *MMP14* and *MMP15* show only moderate overlap in substrates such as *TGM2*, *LAMB1*, and  
415 *LAMC1*, where *MMP14* itself is suggested to have 75 different substrates and interactions (Fig. 5A). Both

416 *ADAMTS1* and *ADAMTS6* only have 7 and 11 substrates or interactions in the CTB niche, respectively (Fig.  
417 5A). This may be partly because *ADAMTS6* had been designated an orphan protease until very recently [45].  
418 Notably, both *ADAMTS1* and *ADAMTS6* interact with substrates that encode proteins important for elastic  
419 fiber assembly, such as *MFAP5*, *FBLN1*, *FBN2*, *FBN1*, and *SDC4* (Fig. 5A). Gene Ontology analysis on the  
420 154 genes encoding CTB metzincin substrates highlights broad functional roles in regulating focal adhesions  
421 and cell substrate junction organization (Fig. 5B); the latter referring to specialized regions of connection  
422 between a cell and the extracellular matrix. These top ontology hits suggest that CTB progenitor metzincins  
423 control the turnover of the extracellular environment.

424 To focus on highly expressed metzincin substrates showing preferential expression in the CTB  
425 niche, we next performed a differential gene expression (DEG) analysis comparing mRNA levels of the 154  
426 NicheNet-identified substrates and binding partners within CTB 1-4 to the other four non-CTB trophoblast  
427 states (i.e., cCTB1, cCTB2, EVT, SCT) (Fig. 5C). DEG analysis identifies 17 genes encoding 11 metzincin  
428 substrates and 6 physical interaction partners enriched within the CTB niche (Fig. 5D). CTB-specific  
429 protease-substrate pairs are summarized in tabular format, where the top three most highly expressed  
430 substrates or binding partners, ordered by fold change (FC) and *p* value ranking, are *APLP2* (encoding  
431 amyloid-like protein 2, a target of ADAM10 and ADAM17), *BCAM* (encoding basal cell adhesion molecule,  
432 a target of ADAM10), and *FBN2* (encoding fibrillin-2, a target of ADAMTS6) (Fig. 5D). Overall, expression  
433 of 154 genes encoding prominent substrates or binding partners of highly expressed CTB proteases was  
434 identified. This interaction matrix provides insights into possible roles proteases may play in the CTB niche.

435

#### 436 ***ADAMTS6* and *FBN2* are co-expressed by CTB progenitors**

437 *FBN2* was the third most highly expressed metzincin protease substrate specific to the CTB niche.  
438 As indicated above, *FBN2* encodes for the protein fibrillin-2, a large extracellular matrix protein important in  
439 the formation of microfibril filaments that serve as scaffolds for other structural proteins [46]. Importantly,  
440 fibrillin-2 is proteolytically degraded by ADAMTS6 [45], a protease whose expression also aligned  
441 preferentially to the CTB niche. Therefore, we set out to verify that both *ADAMTS6* and *FBN2* are specific  
442 and co-expressed within CTB progenitors of the human first trimester placenta. When examining expression  
443 of *ADAMTS6* and *FBN2* in CTB1-4 states (comprising 5477 cells), 2301 cells show co-expression of both  
444 genes (Fig. 6A). Only 159 CTB solely express *ADAMTS6*, whereas approximately 50% of CTB (2654 cells)  
445 express *FBN2* independent of *ADAMTS6* (Fig. 6A). Importantly, both *ADAMTS6* and *FBN2* show similar  
446 expression patterns within the eight scRNA-seq defined trophoblast states, where highest expression levels  
447 of either gene are found in CTB3 (Fig. 6B).

448 Though fibrillin-2 is a direct substrate of ADAMTS6, it is also possible that indirect interactions  
449 between ADAMTS6 and fibrillin-2 may exist. To assess this, we examined the shortest ligand-target  
450 signalling path (protease-target in this case) using NicheNet (all NicheNet-curated data sources were  
451 included). We found that *ADAMTS6* and *FBN2* may potentially interact indirectly through *REST*, *RNF2*, and  
452 *STAT3*, as these genes were moderately expressed in CTB progenitors (Fig. 6C). NicheNet analysis further

453 indicated gene signalling interactions between *PELI2*, *SMAD3*, *SKIL*, *FNI*, and *IRAK1*, stemming from  
454 *ADAMTS6-FNI* interaction and ADAMTS6-related control of the transcription factor REST (Fig. 6C).  
455 However, the potential for an interaction between *ADAMTS6* and *FBN2* via *FNI* is unlikely due to the low  
456 expression of *SMAD3* in all four CTB states (Fig. 6C). Because fibrillin-2 is involved in microfibril/elastic  
457 fiber formation and related tissue resiliency, we next examined the relationship and expression of other genes  
458 central to elastic fiber formation within the CTB niche (Fig. 6D). We focussed on members directly  
459 interacting with *FBN2* (Fig. 6D) and indirectly interacting with *FBN2* (Fig. S3). The majority of microfibril-  
460 linked genes are expressed in CTB states at high levels (e.g., *FBN1*, *EFEMP1*, *FBLN1*, *MFAP1*) (Fig. 6D),  
461 suggesting that elastic fibers/microfibrils play a role in CTB extracellular matrix scaffolding and the possible  
462 establishment or maintenance of the CTB niche.

463 Lastly, we set out to verify *ADAMTS6* and *FBN2* expression and localization within *in vivo*  
464 chorionic villi of first trimester placenta. *In situ* hybridization of *ADAMTS6* and *FBN2* in early (6.3 weeks'  
465 gestation) and late (11.2 weeks' gestation) placentas show that both genes are highly expressed within the  
466 different cell types of floating villi (Fig. 6E). Consistent with scRNA-seq findings, *FBN2* shows a robust  
467 signal within EGFR<sup>+</sup> progenitor CTB from a serial section of the same placenta; little/no *FBN2* signal is  
468 detected within HLA-G<sup>+</sup> anchoring column trophoblasts (Fig. 6E). However, *FBN2* is expressed, albeit at a  
469 lower level, within the multinucleated syncytiotrophoblast (Fig. 6E). The spatial distribution of *ADAMTS6*  
470 within chorionic villi is somewhat surprising. Consistent with scRNA-seq data, moderate signal of  
471 *ADAMTS6* is observed in CTB progenitors, and low/no *ADAMTS6* signal is seen within cells of the  
472 anchoring columns (Fig. 6E). However, high levels of *ADAMTS6* are shown within the syncytiotrophoblast  
473 (Fig. 6E), likely reflecting a limitation of scRNA-seq in capturing multinucleated structures and cells.  
474 Together, this work highlights the expression of *ADAMTS6* and *FBN2*, as well as their interacting genes and  
475 processes, in the first trimester human placenta. Further, these findings provide evidence that the  
476 ADAMTS6-fibrillin-2 protease-substrate pair is co-expressed and largely specific to trophoblasts residing  
477 within the progenitor CTB niche.

## 478 **DISCUSSION**

479 Using established scRNA-seq datasets of first trimester chorionic villi, this work characterizes the  
480 metzincin protease landscape in diverse subtypes and states of human trophoblast. Twenty-four metzincin  
481 proteases and four metalloproteinase inhibitors were mapped to distinct trophoblast subtypes. State-of-the-art  
482 single cell lineage trajectory analyses then aligned metzincin expression dynamics along both the villous and  
483 extravillous differentiation pathways, as well as within the CTB progenitor niche. While metzincin protease  
484 expression showed a strong expression bias towards cells of the EVT lineage, our analyses identified 11  
485 metalloproteases expressed by trophoblasts overlapping with CTB progenitor states. Within CTB  
486 progenitors, we provide a predicted framework of possible metzincin-substrate interactions, highlighting the  
487 importance of elastic fiber/microfibril remodeling processes within the CTB progenitor niche. Specifically,  
488 we show co-expression of *ADAMTS6* and *FBN2*, a recently identified protease-substrate pair, in CTB.  
489 Together, this work comprehensively characterizes the metzincin landscape in human trophoblasts and  
490 provides an important resource for future studies investigating the roles of metzincin proteases in placental  
491 development and function.

492 Previous studies have explored the roles of metzincin proteases in trophoblast biology and have  
493 spatially defined MMP2 [19,47], MMP3 [48], MMP14 [49], MMP15 [50], ADAM8 [51], ADAM12 [20–  
494 22], ADAM28 [52], PAPP A [53], and PAPP A2 [54] to subtypes of trophoblast within first trimester  
495 chorionic villi. Single cell transcriptomic assessment of these aforementioned metzincins performed in this  
496 study overall supports the conclusions of their previous spatial characterizations, with the majority of these  
497 proteases localizing to column trophoblasts and invasive EVT. Absent from this list is MMP9, a matrix  
498 metalloprotease often described as an EVT marker important in controlling trophoblast invasion [55]. It  
499 should be noted that the majority of (if not all) studies describing MMP9 expression specificity to invasive  
500 trophoblast subsets characterized and tested MMP9 function in immortalized trophoblastic cell lines [56] or  
501 inadequately described primary trophoblast cultures [57]. This latter example is especially important as  
502 primary cultures of CTB and EVT are challenging to establish and experiment on. In part, this is because  
503 primary cultures do not passage or proliferate well in culture, and as a result of this, are often quickly over-  
504 run by contaminating placental fibroblasts [3]. Therefore, it is essential for studies aiming to examine the  
505 importance of specific genes or pathways in trophoblast processes to carefully confirm trophoblast identity  
506 using recently accepted molecular and genetic trophoblast-identifying characteristics [58] when deriving  
507 primary cultures.

508 Of the 24 metzincin proteases ascribed to various trophoblast states, to our knowledge, 15 have not  
509 been identified in first trimester trophoblasts, and include MMPs (*MMP11*, *-19*, *-23B*), ADAMs (*ADAM9*, *-*  
510 *10*, *-15*, *-17*, *-19*), ADAMTSs (*ADAMTS1*, *-6*, *-19*, *-20*), and astacins (*TLL1*, *TLL2*, *BMPI*). Notably, PAPP A  
511 and ADAM17 have been localized to the syncytiotrophoblast of term placentas, where their expression is  
512 thought to control growth factor availability [59,60] and disruptions in their regulation may contribute to the  
513 development of preeclampsia [59,61]. Verification of ADAM17 localization by immunofluorescence  
514 imaging supports previous findings that ADAM17 localizes to the syncytiotrophoblast. However, our



515 findings further elaborate on the possible functions of ADAM17 in the placenta in that its expression is also  
516 detected in progenitor CTB, anchoring column trophoblast, and invasive EVT. Notably, *ADAM17* levels  
517 increase in trophoblasts as they progress along both the villous and extravillous pathways, suggesting that it  
518 may coordinate complex processes linked to cell migration and cell-cell fusion. Given the diverse substrates  
519 of ADAM17, both in the context of health and disease, it will be challenging to carefully assign specific  
520 biological functions to ADAM17 in trophoblast development and function. Similar to ADAM17, other  
521 metzincins show a bimodal-like pattern of expression as trophoblast differentiation terminates along the  
522 villous and extravillous pathways; *PAPPA2* and *BMP1* are both highly expressed in EVT and  
523 syncytiotrophoblast precursors. BMP1 controls fibrillar collagen assembly by cleaving C-propeptides of  
524 procollagens I-III and also regulates the availability of TGF $\beta$ -like proteins that are critical in tissue  
525 patterning during development [62]. PAPP2 on the other hand likely regulates IGF-1 and IGF-2  
526 availability and latency through cleavage of IGFBP5 [63] and in turn this cleavage may control trophoblast  
527 proliferation and survival, as well as coordinate placental organ growth.

528 Recent findings have highlighted the importance of metzincin proteases in the mesenchymal [64],  
529 hematopoietic [65] and skeletal muscle [66] stem cell niche. Knowledge on the actions of metzincin  
530 proteases in the cytotrophoblast stem cell niche are, to our understanding, nonexistent. CTB progenitors are  
531 sandwiched between a laminin-rich basal lamina and an overlying syncytium monolayer. This spatial  
532 arrangement limits the source of soluble factors that interact with CTB. Most likely, soluble factors originate  
533 from the overlying syncytiotrophoblast or from within the CTB niche itself. In this study we identify 11  
534 metzincins that are expressed by CTB, though only *MMP15*, *MMP23B*, *ADAMTS6*, *ADAMTS19*, and *TLL1*  
535 are specifically aligned within CTB. Expression of *MMP15*, *MMP23B*, *ADAMTS19*, and *TLL1* align with the  
536 Monocle2 predicted CTB origin, while *ADAMTS6* expression is most specific to the CTB3 progenitor state,  
537 suggesting that these proteases likely regulate processes central to trophoblast stem cell maintenance. The  
538 concept of both membrane-bound and secreted proteases as important factors in controlling stem cell  
539 regeneration and maintenance has been gaining traction in recent years. For example, smooth muscle cell  
540 produced MMP17 controls intestinal stem cell proliferation through cleavage of matricellular proteins like  
541 periostin [67]; while ADAMTS18 regulates the mammary myoepithelial stem cell niche through the  
542 progesterone-Wnt4 controlled processing of collagen [23].

543 Our finding that ADAMTS6 and its recently identified substrate, fibrillin-2 [45], are highly and  
544 specifically expressed in CTB states suggests that ADAMTS6 may also play a role in regulating CTB  
545 progenitor maintenance. Fibrillin-2 is a major component of microfibril elastic fibers that are components of  
546 the extracellular matrix and confer elasticity and resilience to a tissue [68]. Importantly, morphogens like  
547 TGF $\beta$  and BMP family members are sequestered within microfibril elastin matrices, where proteolytic  
548 cleavage of microfibrils liberates these growth factors and in turn generates growth factor gradients  
549 important in tissue patterning and cellular development [69]. It is tempting to speculate that ADAMTS6 may  
550 be coordinating similar events within the CTB niche. Future research will need to focus on the importance of

551 ADAMTS6 in CTB progenitor biology, where newly developed regenerative trophoblast platforms like  
552 human trophoblast stem cell lines [70] and organoids [58,71] can help in defining the interplay between  
553 ADAMT6 and fibrillin-2.

554 In addition to the ADAMTS6-fibrillin-2 interaction within the CTB niche, this study also highlights  
555 154 substrates expressed in CTB that pair with CTB-expressed metzincin proteases. The high selection  
556 threshold applied in our NicheNet modeling ensured inclusion of probable and highly influential interactions.  
557 GO analysis of these 154 substrates identified focal adhesion and cell-matrix interaction pathways to be the  
558 most dominant and represented, suggesting that protease-substrate interactions in the progenitor trophoblast  
559 niche are impacting cell-matrix adhesion, integrin signaling, and matrix-controlled cell polarity.  
560 Interestingly, *BCAM*, encoding a cell adhesion molecule recently identified as being enriched in progenitor  
561 CTB in the first trimester [26], was shown in our analyses to be a top binding partner expressed  
562 preferentially in CTB and found to be specifically interacting with ADAM10. BCAM enables cell-basal  
563 lamina interactions by binding to laminin  $\alpha 5$  chains of heterotrimeric laminin, a major constituent of the  
564 basement membrane ECM [72]. A recent study implicated laminin-1 as one of the key drivers of cell fate  
565 switching in human trophoblast stem cells (hTSC), where addition of laminin-1 to the culture media  
566 switched the directionality of progenitor trophoblast differentiation from the villous pathway towards the  
567 extravillous pathway [73]. Our dataset specifically identifies the cleavage of *LAMA5* and *LAMB1* by *MMP14*  
568 and *MMP15* within the cytotrophoblast niche, further highlighting laminin as a driver of trophoblast stem  
569 cell maintenance. This emphasizes the dependency of trophoblast cell fate decisions on extracellular cues.  
570 Holistically, our current study will function as an important resource in identifying additional metzincin-  
571 substrate interactions that are possibly important in CTB function.

572 An important caveat of the single-cell RNA sequencing approach is created by the current inability  
573 to sequence multinucleated cells contained in the syncytium. As exemplified by *ADAMTS6*, scRNA seq was  
574 unable to show the enrichment of this protease in the syncytium. This led us to miss important insights about  
575 SCT differentiation dynamics. Future single-nuclear sequencing approaches may overcome this limitation.  
576 The stochastic nature of gene expression paired with the high dropout rate that is commonly observed in  
577 single cell sequencing decreases the reliability of some of the findings made, especially with respect to genes  
578 expressed at comparatively low levels. By this reasoning, it is probable that previously described  
579 metalloproteases such as MMP9 do play roles in trophoblast biology albeit not captured by our current  
580 analysis.

581 Here we put in place a comprehensive resource for the investigation of metzincin proteases in first  
582 trimester human trophoblasts. We have effectively characterized the first trimester metzincin protease  
583 landscape by investigating metzincin expression in transcriptomically defined trophoblast states, aligned  
584 trophoblast-expressed metalloproteases to specific lineage trajectories, and identified known protease-  
585 substrate interactions that are likely taking place within the CTB progenitor niche. As a valuable resource to  
586 developmental and placental biologists, we hope that future work will be able to verify and test metzincin-

587 substrate interactions to further elucidate the influence of ECM constituents in regulating trophoblast  
588 stemness and regeneration.

589 **DATA AVAILABILITY/ACCESSION NUMBER**

590 The ArrayExpress accession number for the publicly available data reported in this paper is: E-  
591 MTAB-6701. The GEO accession number for publicly available data reported in this paper is: GSE174481.

592

593 **AUTHOR CONTRIBUTIONS**

594 AGB and JW conceptualized the study. AGB and JW designed the research. JW, BC, JB performed  
595 experiments and analysed data. JW and MJS prepared computational datasets and bioinformatics pipelines.  
596 AGB and JW wrote the paper. All authors read and approved the manuscript.

597

598 **FUNDING**

599 This work was supported by a Natural Sciences and Engineering Research Council of Canada  
600 Discovery (RGPIN-2020-05378) and Accelerator Grants (RGPAS-2020-00013) (to AGB), a Canadian  
601 Institutes of Health Research 201809PJT-407571-CIA-CAAA) operating grant (to AGB)

602

603 **ACKNOWLEDGEMENTS**

604 The authors extend their sincere gratitude to the hard work of staff at British Columbia's Women's  
605 Hospital's CARE Program for recruiting participants to our study. We also wish to acknowledge Jenna  
606 Treissman, Desmond Hui, and Dr. Hoa Le for their contribution to the establishment of the 10x single-cell  
607 RNA seq datasets.

608

609 **COMPETING INTERESTS**

610 The authors declare that no competing interests exist.

611

612 **REFERENCES**

- 613 1. Roberts RM, Green JA, Schulz LC. The evolution of the placenta. *Reproduction*. 2016;152:R179–  
614 89.
- 615 2. Turco MY, Moffett A. Development of the human placenta. *Development*. 2019;146:dev163428.
- 616 3. Pollheimer J, Vondra S, Baltayeva J, Beristain AG, Knöfler M. Regulation of Placental Extravillous  
617 Trophoblasts by the Maternal Uterine Environment. *Front Immunol*. 2018;9:2597.
- 618 4. Saha B, Ganguly A, Home P, Bhattacharya B, Ray S, Ghosh A, et al. TEAD4 ensures  
619 postimplantation development by promoting trophoblast self-renewal: An implication in early  
620 human pregnancy loss. *Proc Natl Acad Sci*. 2020;117:17864–75.
- 621 5. Sun C, Groom KM, Oyston C, Chamley LW, Clark AR, James JL. The placenta in fetal growth  
622 restriction: What is going wrong? *Placenta*. 2020;96:10–8.
- 623 6. Rana S, Lemoine E, Granger JP, Karumanchi SA. Preeclampsia: Pathophysiology, Challenges, and  
624 Perspectives. *Circ Res*. 2019;124:1094–112.
- 625 7. Knöfler M, Haider S, Saleh L, Pollheimer J, Gamage TKJB, James J. Human placenta and  
626 trophoblast development: key molecular mechanisms and model systems. *Cell Mol Life Sci*.  
627 2019;76:3479–96.
- 628 8. Abbas Y, Turco MY, Burton GJ, Moffett A. Investigation of human trophoblast invasion *in vitro*.  
629 *Hum Reprod Update*. 2020;26:501–13.
- 630 9. Varberg KM, Soares MJ. Paradigms for investigating invasive trophoblast cell development and  
631 contributions to uterine spiral artery remodeling. *Placenta*. 2021;113:48–56.
- 632 10. Velicky P, Knöfler M, Pollheimer J. Function and control of human invasive trophoblast  
633 subtypes: Intrinsic vs. maternal control. *Cell Adhes Migr*. 2016;10:154–62.
- 634 11. Weber S, Saftig P. Ectodomain shedding and ADAMs in development. *Development*.  
635 2012;139:3693–709.
- 636 12. Kessenbrock K, Wang C-Y, Werb Z. Matrix metalloproteinases in stem cell regulation and  
637 cancer. *Matrix Biol*. 2015;44–46:184–90.
- 638 13. Jung J-C, Leco KJ, Edwards DR, Fini ME. Matrix metalloproteinases mediate the dismantling of  
639 mesenchymal structures in the tadpole tail during thyroid hormone-induced tail resorption. *Dev*  
640 *Dyn*. 2002;223:402–13.
- 641 14. Mead TJ, Apte SS. ADAMTS proteins in human disorders. *Matrix Biol*. 2018;71–72:225–39.
- 642 15. Kessenbrock K, Plaks V, Werb Z. Matrix Metalloproteinases: Regulators of the Tumor  
643 Microenvironment. *Cell*. 2010;141:52–67.
- 644 16. Nagase H, Visse R, Murphy G. Structure and function of matrix metalloproteinases and TIMPs.  
645 *Cardiovasc Res*. 2006;69:562–73.

- 646 17. White JM. ADAMs: modulators of cell–cell and cell–matrix interactions. *Curr Opin Cell Biol.*  
647 2003;15:598–606.
- 648 18. Chakraborty D, Cui W, Rosario GX, Scott RL, Dhakal P, Renaud SJ, et al. HIF-KDM3A-MMP12  
649 regulatory circuit ensures trophoblast plasticity and placental adaptations to hypoxia. *Proc Natl*  
650 *Acad Sci.* 2016;113:E7212–21.
- 651 19. Tian F, Cheng Y, Li X, Wang F, Qin C, Ma X, et al. The YY1 / MMP2 axis promotes trophoblast  
652 invasion at the maternal–fetal interface. *J Pathol.* 2016;239:36–47.
- 653 20. Aghababaei M, Perdu S, Irvine K, Beristain AG. A disintegrin and metalloproteinase 12  
654 (ADAM12) localizes to invasive trophoblast, promotes cell invasion and directs column outgrowth  
655 in early placental development. *MHR Basic Sci Reprod Med.* 2014;20:235–49.
- 656 21. Biadasiewicz K, Fock V, Dekan S, Proestling K, Velicky P, Haider S, et al. Extravillous  
657 Trophoblast-Associated ADAM12 Exerts Pro-Invasive Properties, Including Induction of Integrin  
658 Beta 1-Mediated Cellular Spreading1. *Biol Reprod [Internet].* 2014 [cited 2022 Feb 1];90. Available  
659 from: <https://academic.oup.com/biolreprod/article-lookup/doi/10.1095/biolreprod.113.115279>
- 660 22. Aghababaei M, Hogg K, Perdu S, Robinson WP, Beristain AG. ADAM12-directed ectodomain  
661 shedding of E-cadherin potentiates trophoblast fusion. *Cell Death Differ.* 2015;22:1970–84.
- 662 23. Ataca D, Aouad P, Constantin C, Laszlo C, Beleut M, Shamseddin M, et al. The secreted  
663 protease Adamts18 links hormone action to activation of the mammary stem cell niche. *Nat*  
664 *Commun.* 2020;11:1571.
- 665 24. Shan X, Tomlinson L, Yang Q, Colognato H. Distinct Requirements for Extracellular and  
666 Intracellular MMP12 in the Development of the Adult V-SVZ Neural Stem Cell Niche. *Stem Cell*  
667 *Rep.* 2018;10:984–99.
- 668 25. Vento-Tormo R, Efremova M, Botting RA, Turco MY, Vento-Tormo M, Meyer KB, et al. Single-  
669 cell reconstruction of the early maternal–fetal interface in humans. *Nature.* 2018;563:347–53.
- 670 26. Shannon MJ, Baltayeva J, Castellana B, Wächter J, McNeill GL, Yoon JS, et al. Cell trajectory  
671 modeling identifies a primitive trophoblast state defined by BCAM enrichment. *Development.*  
672 2022;149:dev199840.
- 673 27. Butler A, Hoffman P, Smibert P, Papalexi E, Satija R. Integrating single-cell transcriptomic data  
674 across different conditions, technologies, and species. *Nat Biotechnol.* 2018;36:411–20.
- 675 28. Stuart T, Butler A, Hoffman P, Hafemeister C, Papalexi E, Mauck WM, et al. Comprehensive  
676 Integration of Single-Cell Data. *Cell.* 2019;177:1888-1902.e21.
- 677 29. Puram SV, Tirosh I, Parikh AS, Patel AP, Yizhak K, Gillespie S, et al. Single-Cell Transcriptomic  
678 Analysis of Primary and Metastatic Tumor Ecosystems in Head and Neck Cancer. *Cell.*  
679 2017;171:1611-1624.e24.
- 680 30. Tirosh I, Izar B, Prakadan SM, Wadsworth MH, Treacy D, Trombetta JJ, et al. Dissecting the  
681 multicellular ecosystem of metastatic melanoma by single-cell RNA-seq. *Science.* 2016;352:189–  
682 96.

- 683 31. Trapnell C, Cacchiarelli D, Grimsby J, Pokharel P, Li S, Morse M, et al. The dynamics and  
684 regulators of cell fate decisions are revealed by pseudotemporal ordering of single cells. *Nat*  
685 *Biotechnol.* 2014;32:381–6.
- 686 32. Qiu X, Mao Q, Tang Y, Wang L, Chawla R, Pliner HA, et al. Reversed graph embedding resolves  
687 complex single-cell trajectories. *Nat Methods.* 2017;14:979–82.
- 688 33. Qiu X, Hill A, Packer J, Lin D, Ma Y-A, Trapnell C. Single-cell mRNA quantification and  
689 differential analysis with Census. *Nat Methods.* 2017;14:309–15.
- 690 34. Cao J, Spielmann M, Qiu X, Huang X, Ibrahim DM, Hill AJ, et al. The single-cell transcriptional  
691 landscape of mammalian organogenesis. *Nature.* 2019;566:496–502.
- 692 35. La Manno G, Soldatov R, Zeisel A, Braun E, Hochgerner H, Petukhov V, et al. RNA velocity of  
693 single cells. *Nature.* 2018;560:494–8.
- 694 36. Bergen V, Lange M, Peidli S, Wolf FA, Theis FJ. Generalizing RNA velocity to transient cell states  
695 through dynamical modeling. *Nat Biotechnol.* 2020;38:1408–14.
- 696 37. Finak G, McDavid A, Yajima M, Deng J, Gersuk V, Shalek AK, et al. MAST: a flexible statistical  
697 framework for assessing transcriptional changes and characterizing heterogeneity in single-cell  
698 RNA sequencing data. *Genome Biol.* 2015;16:278.
- 699 38. Browaeys R, Saelens W, Saeys Y. NicheNet: modeling intercellular communication by linking  
700 ligands to target genes. *Nat Methods.* 2020;17:159–62.
- 701 39. Yu G, Wang L-G, Han Y, He Q-Y. clusterProfiler: an R Package for Comparing Biological Themes  
702 Among Gene Clusters. *OMICS J Integr Biol.* 2012;16:284–7.
- 703 40. Yu G, He Q-Y. ReactomePA: an R/Bioconductor package for reactome pathway analysis and  
704 visualization. *Mol Biosyst.* 2016;12:477–9.
- 705 41. Aghababaei M, Hogg K, Perdu S, Robinson WP, Beristain AG. ADAM12-directed ectodomain  
706 shedding of E-cadherin potentiates trophoblast fusion. *Cell Death Differ.* 2015;22:1970–84.
- 707 42. Haider S, Meinhardt G, Saleh L, Fiala C, Pollheimer J, Knöfler M. Notch1 controls development  
708 of the extravillous trophoblast lineage in the human placenta. *Proc Natl Acad Sci.*  
709 2016;113:E7710–9.
- 710 43. Hiden U, Ghaffari-Tabrizi N, Gauster M, Tam-Amersdorfer C, Cetin I, Dieber-Rotheneder M, et  
711 al. Membrane-Type Matrix Metalloproteinase 1 Regulates Trophoblast Functions and Is Reduced  
712 in Fetal Growth Restriction. *Am J Pathol.* 2013;182:1563–71.
- 713 44. Raredon MSB, Yang J, Kothapalli N, Kaminski N, Niklason LE, Kluger Y. Comprehensive  
714 visualization of cell-cell interactions in single-cell and spatial transcriptomics with NICHES  
715 [Internet]. *Bioinformatics*; 2022 Jan. Available from:  
716 <http://biorxiv.org/lookup/doi/10.1101/2022.01.23.477401>

- 717 45. Mead TJ, Martin DR, Wang LW, Cain SA, Gulec C, Cahill E, et al. Proteolysis of fibrillin-2  
718 microfibrils is essential for normal skeletal development [Internet]. *Developmental Biology*; 2021  
719 Feb. Available from: <http://biorxiv.org/lookup/doi/10.1101/2021.02.03.429587>
- 720 46. Quondamatteo F, Reinhardt DP, Charbonneau NL, Pophal G, Sakai LY, Herken R. Fibrillin-1 and  
721 fibrillin-2 in human embryonic and early fetal development. *Matrix Biol.* 2002;21:637–46.
- 722 47. Jain CV, Jessmon P, Barrak CT, Bolnick AD, Kilburn BA, Hertz M, et al. Trophoblast survival  
723 signaling during human placentation requires HSP70 activation of MMP2-mediated HBEGF  
724 shedding. *Cell Death Differ.* 2017;24:1772–83.
- 725 48. Husslein H, Haider S, Meinhardt G, Prast J, Sonderegger S, Knöfler M. Expression, Regulation  
726 and Functional Characterization of Matrix Metalloproteinase-3 of Human Trophoblast. *Placenta.*  
727 2009;30:284–91.
- 728 49. Bjorn S. Co-ordinated expression of MMP-2 and its putative activator, MT1-MMP, in human  
729 placentation. *Mol Hum Reprod.* 1997;3:713–23.
- 730 50. Majali-Martinez A, Hoch D, Tam-Amersdorfer C, Pollheimer J, Glasner A, Ghaffari-Tabrizi-Wizsy  
731 N, et al. Matrix metalloproteinase 15 plays a pivotal role in human first trimester cytotrophoblast  
732 invasion and is not altered by maternal obesity. *FASEB J Off Publ Fed Am Soc Exp Biol.*  
733 2020;34:10720–30.
- 734 51. Le HT, Atif J, Mara DL, Castellana B, Treissman J, Baltayeva J, et al. ADAM8 localizes to  
735 extravillous trophoblasts within the maternal–fetal interface and potentiates trophoblast cell line  
736 migration through a  $\beta$ 1 integrin-mediated mechanism. *MHR Basic Sci Reprod Med.* 2018;24:495–  
737 509.
- 738 52. De Luca LC, Le HT, Mara DL, Beristain AG. ADAM28 localizes to HLA-G + trophoblasts and  
739 promotes column cell outgrowth. *Placenta.* 2017;55:71–80.
- 740 53. Handschuh K, Guibourdenche J, Guesnon M, Laurendeau I, Evainbrion D, Fournier T.  
741 Modulation of PAPP-A Expression By PPAR $\gamma$  in Human First Trimester Trophoblast. *Placenta.*  
742 2006;27:127–34.
- 743 54. Wang HY, Zhang Z, Yu S. Expression of PAPP2 in human fetomaternal interface and  
744 involvement in trophoblast invasion and migration. *Genet Mol Res [Internet].* 2016 [cited 2022  
745 Feb 8];15. Available from: <http://www.funpecrp.com.br/gmr/year2016/vol15-3/pdf/gmr8075.pdf>
- 746 55. Bischof P, Meisser A, Campana A. Control of MMP-9 expression at the maternal–fetal  
747 interface. *J Reprod Immunol.* 2002;55:3–10.
- 748 56. Yang X, Chen D, He B, Cheng W. NRP1 and MMP9 are dual targets of RNA-binding protein QK15  
749 to alter VEGF-R/ NRP1 signalling in trophoblasts in preeclampsia. *J Cell Mol Med.* 2021;25:5655–  
750 70.
- 751 57. Wang M, Xu Y, Wang P, Xu Y, Jin P, Wu Z, et al. Galectin-14 Promotes Trophoblast Migration  
752 and Invasion by Upregulating the Expression of MMP-9 and N-Cadherin. *Front Cell Dev Biol.*  
753 2021;9:645658.



- 754 58. Turco MY, Gardner L, Kay RG, Hamilton RS, Prater M, Hollinshead MS, et al. Trophoblast  
755 organoids as a model for maternal–fetal interactions during human placentation. *Nature*.  
756 2018;564:263–7.
- 757 59. Ma R, Gu B, Gu Y, Groome LJ, Wang Y. Down-Regulation of TIMP3 Leads to Increase in TACE  
758 Expression and TNF $\alpha$  Production by Placental Trophoblast Cells. *Am J Reprod Immunol*.  
759 2014;71:427–33.
- 760 60. Christians JK, Beristain AG. ADAM12 and PAPP-A: Candidate regulators of trophoblast invasion  
761 and first trimester markers of healthy trophoblasts. *Cell Adhes Migr*. 2016;10:147–53.
- 762 61. Birdir C, Droste L, Fox L, Frank M, Fryze J, Enekwe A, et al. Predictive value of sFlt-1, PlGF, sFlt-  
763 1/PlGF ratio and PAPP-A for late-onset preeclampsia and IUGR between 32 and 37 weeks of  
764 pregnancy. *Pregnancy Hypertens*. 2018;12:124–8.
- 765 62. Hopkins DR, Keles S, Greenspan DS. The bone morphogenetic protein 1/Tolloid-like  
766 metalloproteinases. *Matrix Biol*. 2007;26:508–23.
- 767 63. Overgaard MT, Boldt HB, Laursen LS, Sottrup-Jensen L, Conover CA, Oxvig C. Pregnancy-  
768 associated Plasma Protein-A2 (PAPP-A2), a Novel Insulin-like Growth Factor-binding Protein-5  
769 Proteinase. *J Biol Chem*. 2001;276:21849–53.
- 770 64. Almalki SG, Agrawal DK. Effects of matrix metalloproteinases on the fate of mesenchymal stem  
771 cells. *Stem Cell Res Ther*. 2016;7:129.
- 772 65. Klein G, Schmal O, Aicher WK. Matrix metalloproteinases in stem cell mobilization. *Matrix Biol*.  
773 2015;44–46:175–83.
- 774 66. Du H, Shih C-H, Wosczyzna MN, Mueller AA, Cho J, Aggarwal A, et al. Macrophage-released  
775 ADAMTS1 promotes muscle stem cell activation. *Nat Commun*. 2017;8:669.
- 776 67. Martín-Alonso M, Iqbal S, Vornewald PM, Lindholm HT, Damen MJ, Martínez F, et al. Smooth  
777 muscle-specific MMP17 (MT4-MMP) regulates the intestinal stem cell niche and regeneration  
778 after damage. *Nat Commun*. 2021;12:6741.
- 779 68. Thomson J, Singh M, Eckersley A, Cain SA, Sherratt MJ, Baldock C. Fibrillin microfibrils and  
780 elastic fibre proteins: Functional interactions and extracellular regulation of growth factors. *Semin  
781 Cell Dev Biol*. 2019;89:109–17.
- 782 69. Robertson IB, Horiguchi M, Zilberberg L, Dabovic B, Hadjiolova K, Rifkin DB. Latent TGF- $\beta$ -  
783 binding proteins. *Matrix Biol J Int Soc Matrix Biol*. 2015;47:44–53.
- 784 70. Okae H, Toh H, Sato T, Hiura H, Takahashi S, Shirane K, et al. Derivation of Human Trophoblast  
785 Stem Cells. *Cell Stem Cell*. 2018;22:50-63.e6.
- 786 71. Haider S, Meinhardt G, Saleh L, Kunihs V, Gamperl M, Kaindl U, et al. Self-Renewing  
787 Trophoblast Organoids Recapitulate the Developmental Program of the Early Human Placenta.  
788 *Stem Cell Rep*. 2018;11:537–51.

789 72. Godavarthy PS, Walter CB, Lengerke C, Klein G. The Laminin Receptors Basal Cell Adhesion  
790 Molecule/Lutheran and Integrin  $\alpha7\beta1$  on Human Hematopoietic Stem Cells. *Front Cell Dev Biol.*  
791 2021;9:675240.

792 73. Mischler A, Karakis V, Mahinthakumar J, Carberry CK, San Miguel A, Rager JE, et al. Two distinct  
793 trophoctoderm lineage stem cells from human pluripotent stem cells. *J Biol Chem.*  
794 2021;296:100386.

795

796

797 **FIGURE LEGENDS**

798 **Figure 1: The protease landscape within the trophoblast interface**

799 (A) Schematic of first trimester chorionic villous showing cytotrophoblast differentiation along the villous  
800 and extravillous pathways. Highlighted are trophoblast cell types: Cytotrophoblast (CTB), Extravillous  
801 trophoblast (EVT), Column cytotrophoblast (cCTB), Syncytiotrophoblast precursor (SCTp). Uniform  
802 Manifold Approximation Projection (UMAP) of 7789 captured trophoblasts including 8 trophoblast clusters:  
803 CTB1-4, EVT, cCTB1-2, SCTp. Approximate locations of *in silico*-denoted clusters are highlighted with  
804 black arrows. (B) Heatmap showing the average expression of 24 identified proteases in each trophoblast  
805 cluster. Trophoblast (sub)lineage identifying genes *HLA-G* (EVT), *TEAD4* (CTB), *ERVFRD-1* (SCT) are  
806 included. (C) Feature plots denoting cluster-associated gene expression and violin plots showing gene  
807 expression range of highly expressed proteases in CTB and EVT niches, in terminally differentiated cells,  
808 and in all clusters (ubiquitous).  
809

**Figure 1**

A

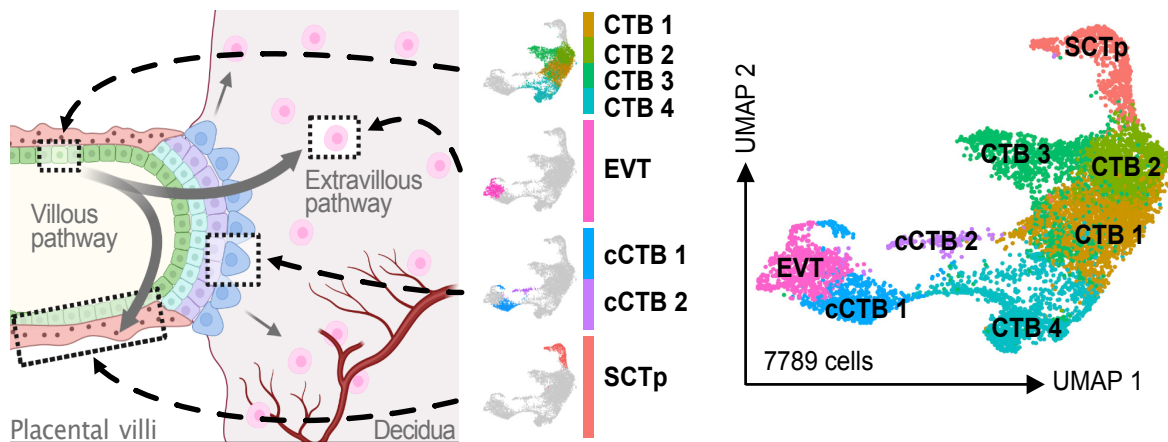

B

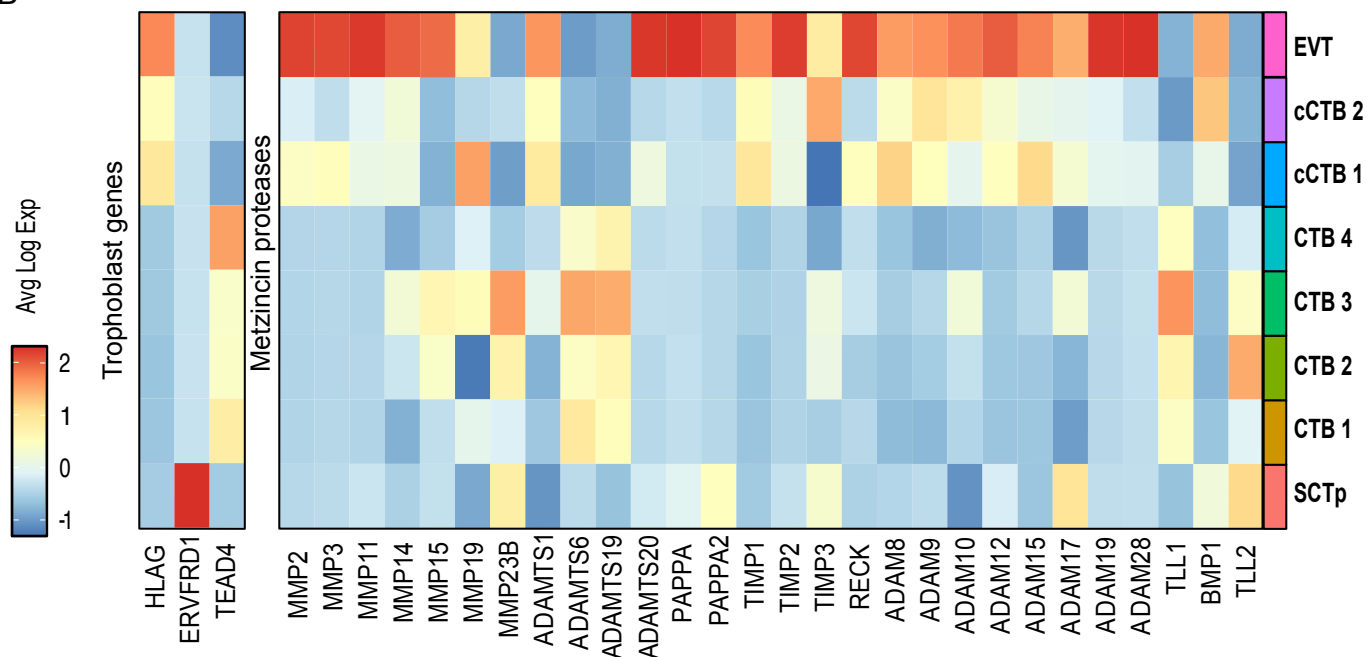

C

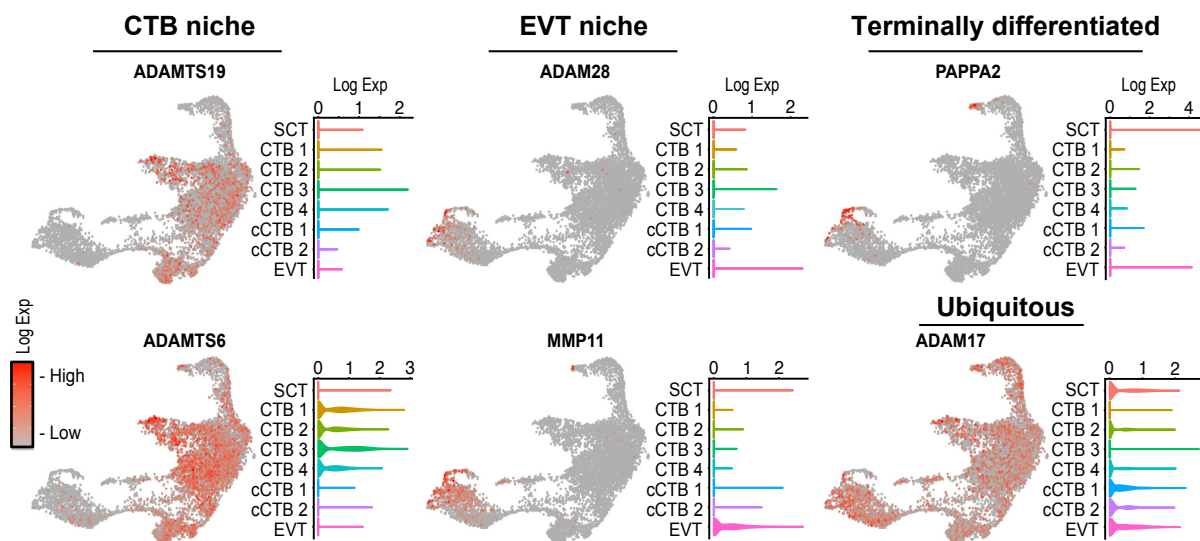

810 **Figure 2: ADAM17 localization within first trimester chorionic villi**

811 **(A)** Representative immunofluorescence (IF) images of HLA-G, EGFR, human chorionic gonadotrophin  
812 (HCG), cytokeratin 7 (CK7), and ADAM17 in first trimester placental anchoring villi. Villi labeled with  
813 polyclonal rabbit IgG in place of primary antibody serves as background signal control. Shown are proximal  
814 column trophoblasts (PCT), distal column trophoblasts (DCT), syncytiotrophoblasts (SCT), and  
815 cytotrophoblasts (CTB). Bar = 100  $\mu$ m. **(B)** Mean fluorescent intensity (MFI) measurements of ADAM17 in  
816 proximal, medial, and distal first trimester anchoring placental villi section (n = 3). Statistical analyses  
817 between groups were performed using ANOVA and two-tailed Tukey post-test; significance  $p < 0.05$  \*\*\*\* =  
818  $p < 0.0001$ .

819

**Figure 2**

**A**

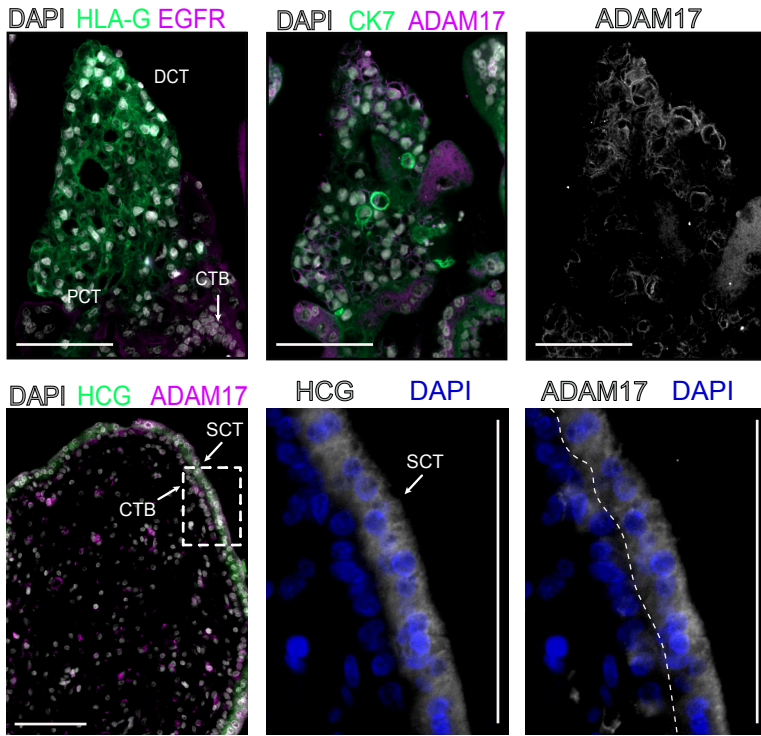

**B**

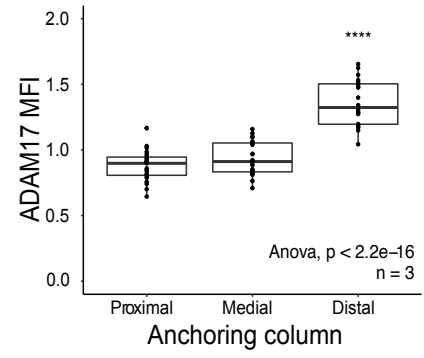

820 **Figure 3: Metalloprotease dynamics along trophoblast lineage trajectories**

821 **(A)** Monocle 2 pseudotime graph showing trophoblast cluster distribution along the villous and extravillous  
822 differentiation pathway. **(B)** Heatmap highlighting expression of 24 identified proteases and 4 protease  
823 inhibitors across Monocle2-informed pseudotime. Included within the heatmap are known genes that align  
824 with the CTB (*CDX2*, *TEAD4*), the SCT (*ERVFRD-1*), the cCTB (*NOTCH1*), and the EVT (*HLA-G*) states.

825

**Figure 3**

A

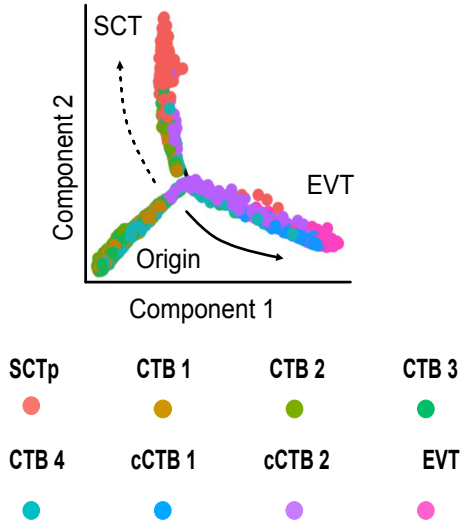

B

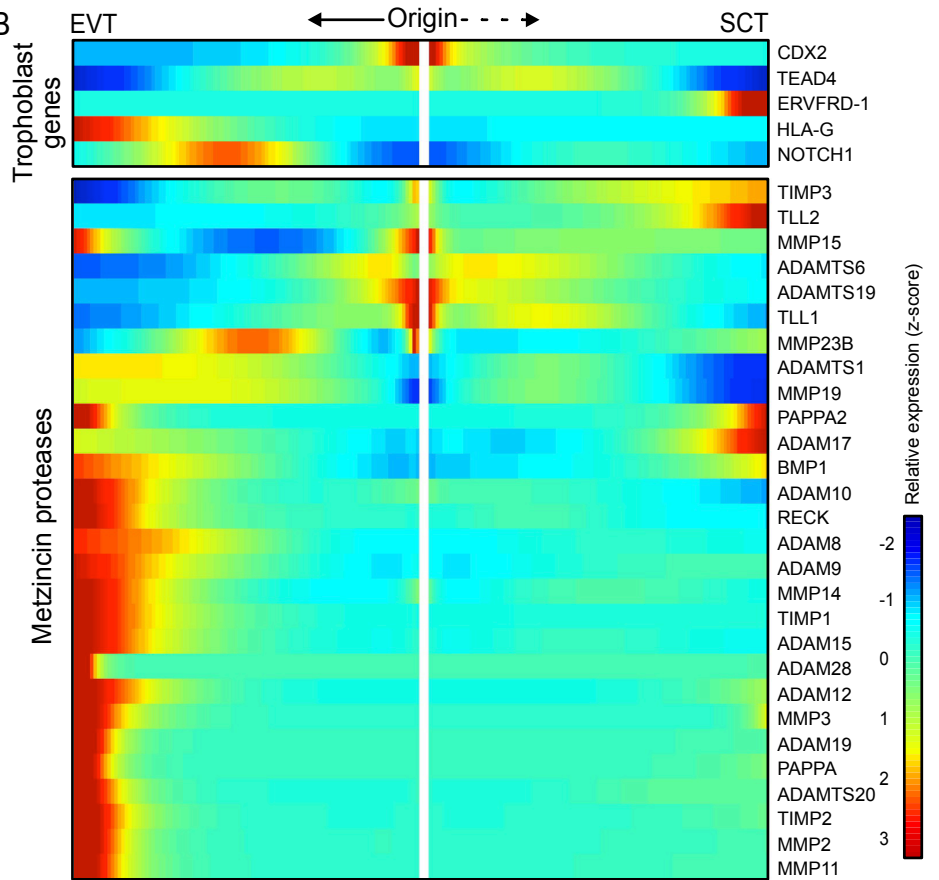



826 **Figure 4: Metzincin proteases and the CTB niche**

827 **(A)** Feature plot showing trophoblast cell states overlain with the generated RNA velocity vector field  
828 (arrows), designating trophoblast differentiation directionality. Feature plots denoting cluster specificity and  
829 violin plots showing gene expression range of **(B)** prominent CTB niche markers, **(C)** CTB specific  
830 proteases, **(D)** ubiquitous proteases, and **(E)** bimodal proteases overlain with the generated RNA velocity  
831 vector field (arrows), designating trophoblast differentiation directionality.

832

**Figure 4**

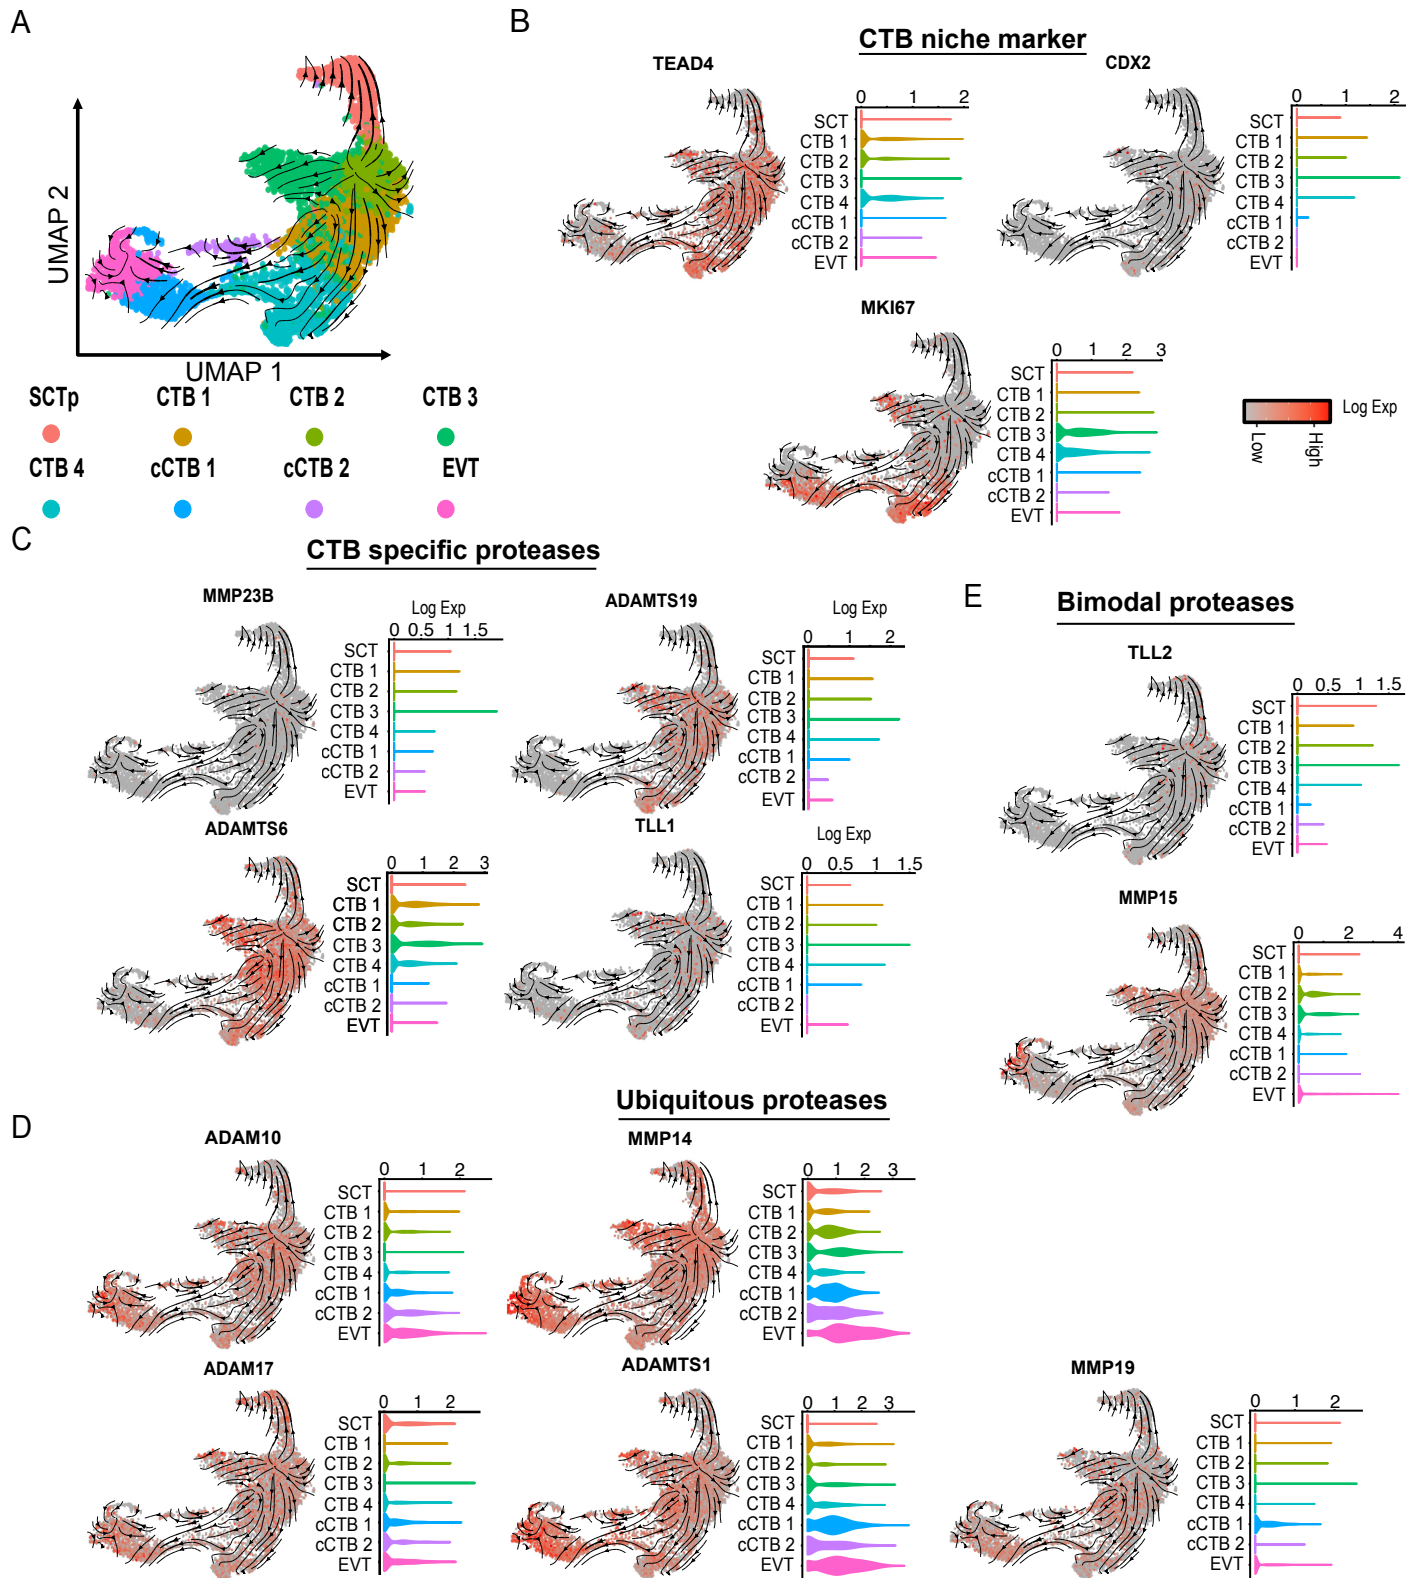

833 **Figure 5: CTB metalloprotease substrates and downstream targets**

834 **(A)** Heatmap showing NicheNet-identified potential interactions between CTB proteases and their respective  
835 substrates and binding partners in CTB cluster 1-4. Package curated interaction potentials are marked with  
836 pink colour intensity. Literature identified interactions (which possess no prior interaction potential) are  
837 marked in lime green. Literature identified substrates are marked in blue. **(B)** Gene ontology results showing  
838 pathways enriched for identified substrates and interactions ( $n=154$  genes). **(C)** Volcano plot showing  
839 differentially expressed genes between CTB1-4 and other trophoblast clusters (cCTB 1-2, EVT, SCTp).  
840 Previously identified substrates, bindings partners and indirect targets are highlighted in pink (NicheNet-  
841 curated), lime green (library curated interacting partners) or blue (library curated substrates). **(D)** Table  
842 showing top identified substrates and interactions (avg log fold change  $> 0.5$  & p value  $< 10e-4$ ) and their  
843 corresponding proteases.

844

# Figure 5

## A Metzincin substrates and interactions

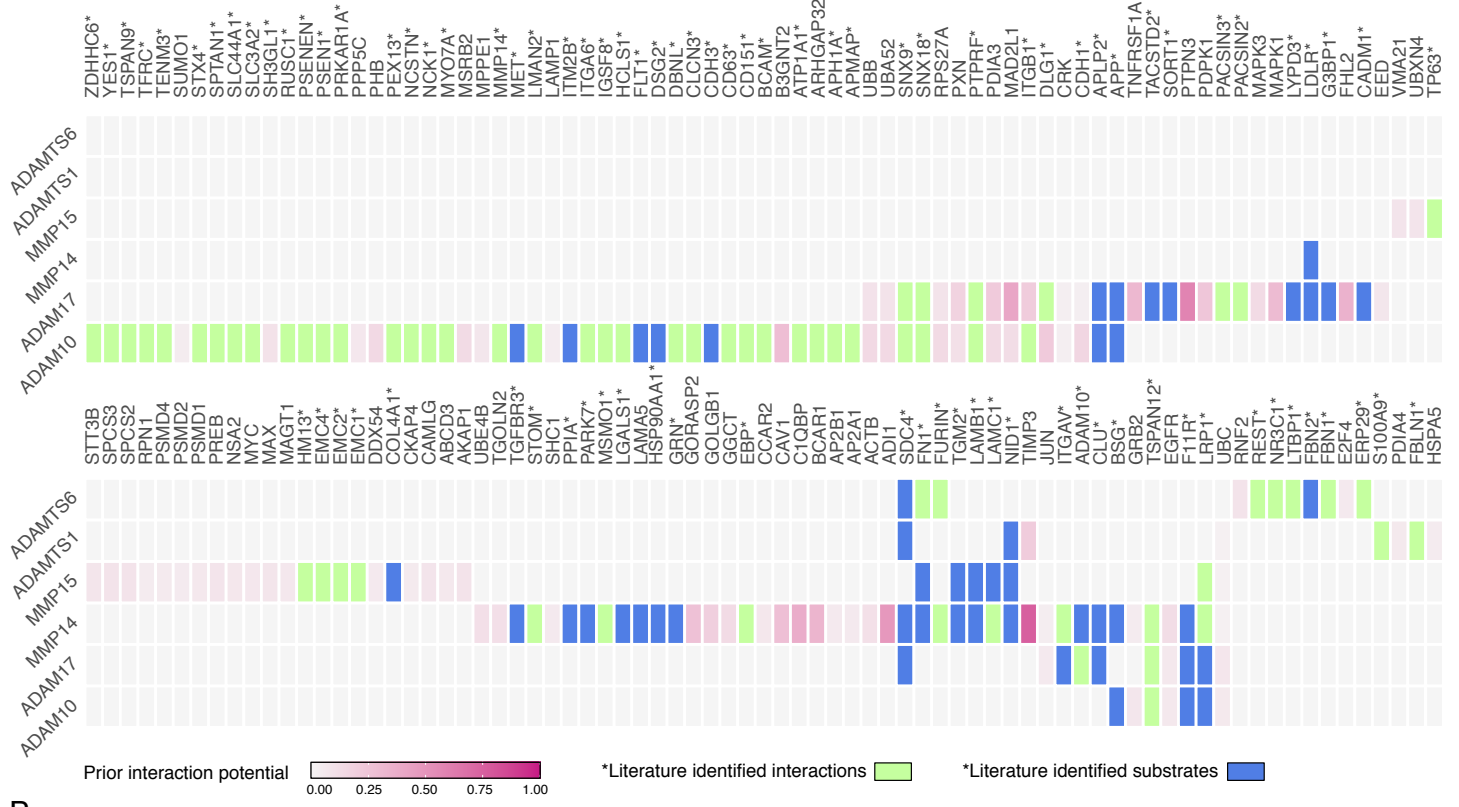

## B Functional roles of top substrates and interactions

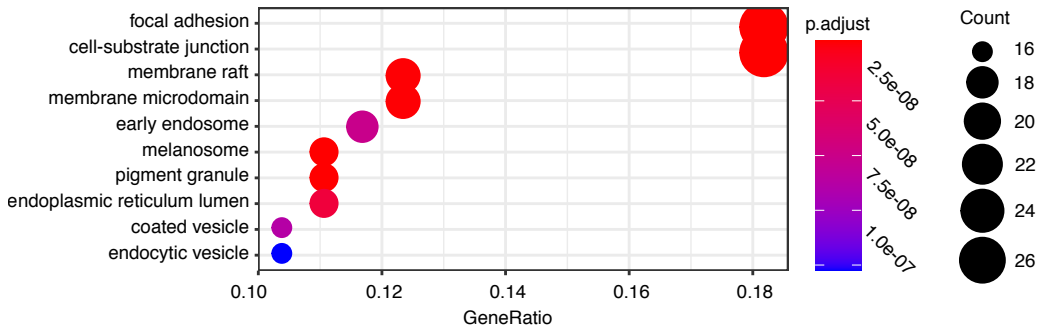

## C DEG of metalloprotease substrates and interactions in the CTB niche

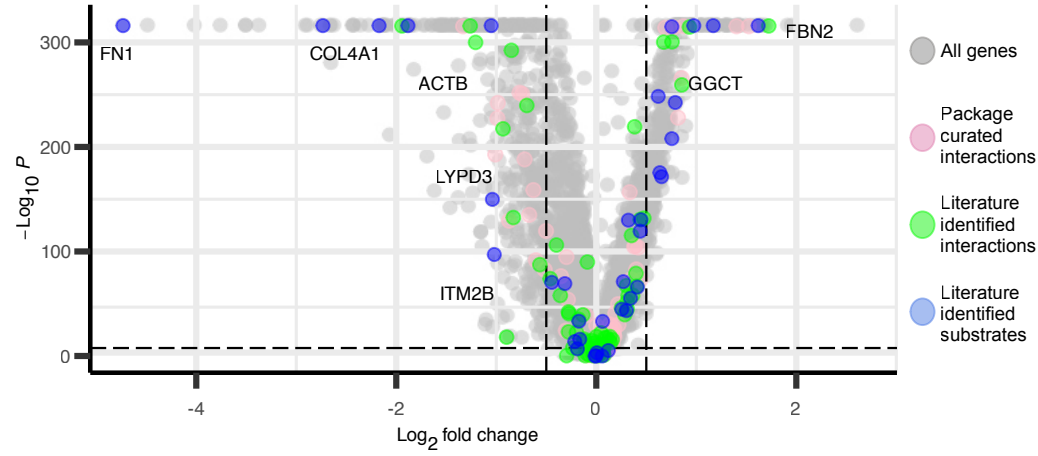

## D Interactions most specific to the CTB niche

| Substrates & interactions | Metalloprotease |
|---------------------------|-----------------|
| APLP2                     | ADAM10/ADAM17   |
| BCAM                      | ADAM10          |
| FBN2                      | ADAMTS6         |
| GGCT                      | MMP14           |
| JUN                       | ADAM17/MMP14    |
| TGM2                      | MMP14/MMP15     |
| UBB                       | ADAM10/ADAM17   |
| MET                       | ADAM10          |
| ITGA6                     | ADAM10          |
| ADI1                      | MMP14           |
| EGFR                      | MMP14           |
| CADM1                     | ADAM17          |
| FBN1                      | ADAMTS6         |
| CDH1                      | ADAM10/ADAM17   |
| LAMA5                     | MMP14           |
| APP                       | ADAM10/ADAM17   |
| LAMB1                     | MMP14/MMP15     |

(Log2 FC >0.5 & p-value < 10e-4)

845 **Figure 6: ADAMTS6 and FBN2 characterization within the CTB niche**

846 **(A)** Volcano plot highlighting *FBN2* specificity to the CTB niche compared to all other differentially  
847 expressed genes between CTB1-4 and other trophoblast clusters (cCTB 1-2, EVT, SCTp). **(B)** Diagram  
848 illustrating cells expressing neither *ADAMTS6* nor *FBN2* (white), *ADAMTS6* expressed alone (green), *FBN2*  
849 expressed alone (pink), or *ADAMTS6* and *FBN2* co-expression (grey). **(C)** Violin plot showing expression of  
850 *ADAMTS6* and *FBN2* within identified trophoblasts. Cluster identities are indicated by colour. **(D)** Diagram  
851 illustrating alternative interaction pathways between *ADAMTS6* and *FBN2* as calculated by nichenet.  
852 Percentage of CTB cells expressing relevant genes are marked in red. Solid arrows designate directionality  
853 of protein-protein interactions. Dashed arrows designate directionality of protein-gene interactions. **(E)**  
854 Percentage of CTB cells expressing genes interacting with *FBN2* in the elastic fibre formation pathway  
855 (Reactome pathway database). **(F)** Representative *in situ* hybridization images showing mRNA expression of  
856 *ADAMTS6* and *FBN2* in floating and anchoring villi of early (6.3 weeks) and late (11.2 weeks) first trimester  
857 chorionic villi. Proximal column trophoblasts (PCT), distal column trophoblasts (DCT), cytotrophoblasts  
858 (CTB) and syncytiotrophoblasts (SCT) are indicated. Serially sectioned villi labeled with HLA-G and EGFR  
859 help identify column and cytotrophoblast compartments; nuclei are labeled with DAPI. Bar = 100  $\mu$ m.

860

**Figure 6**

A

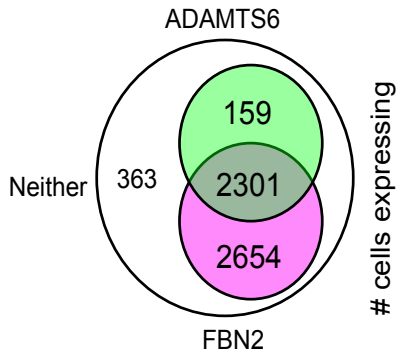

C

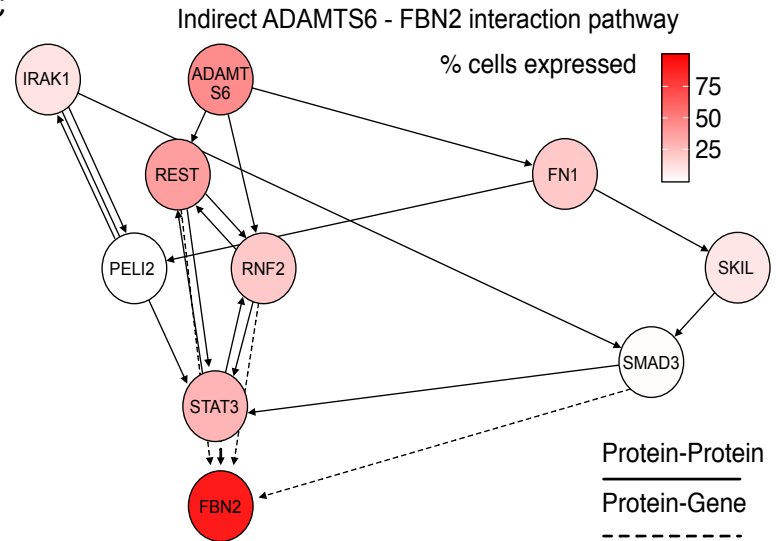

B

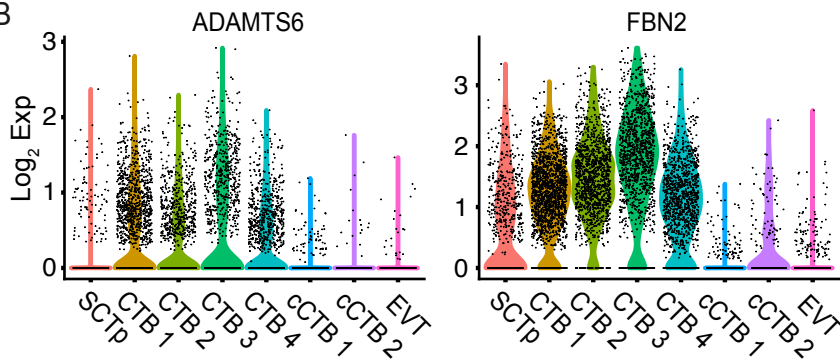

D

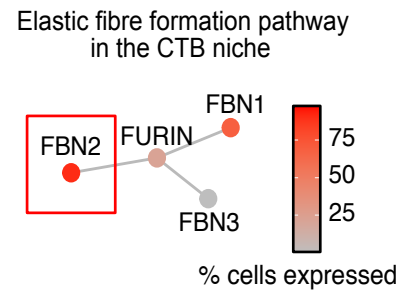

E

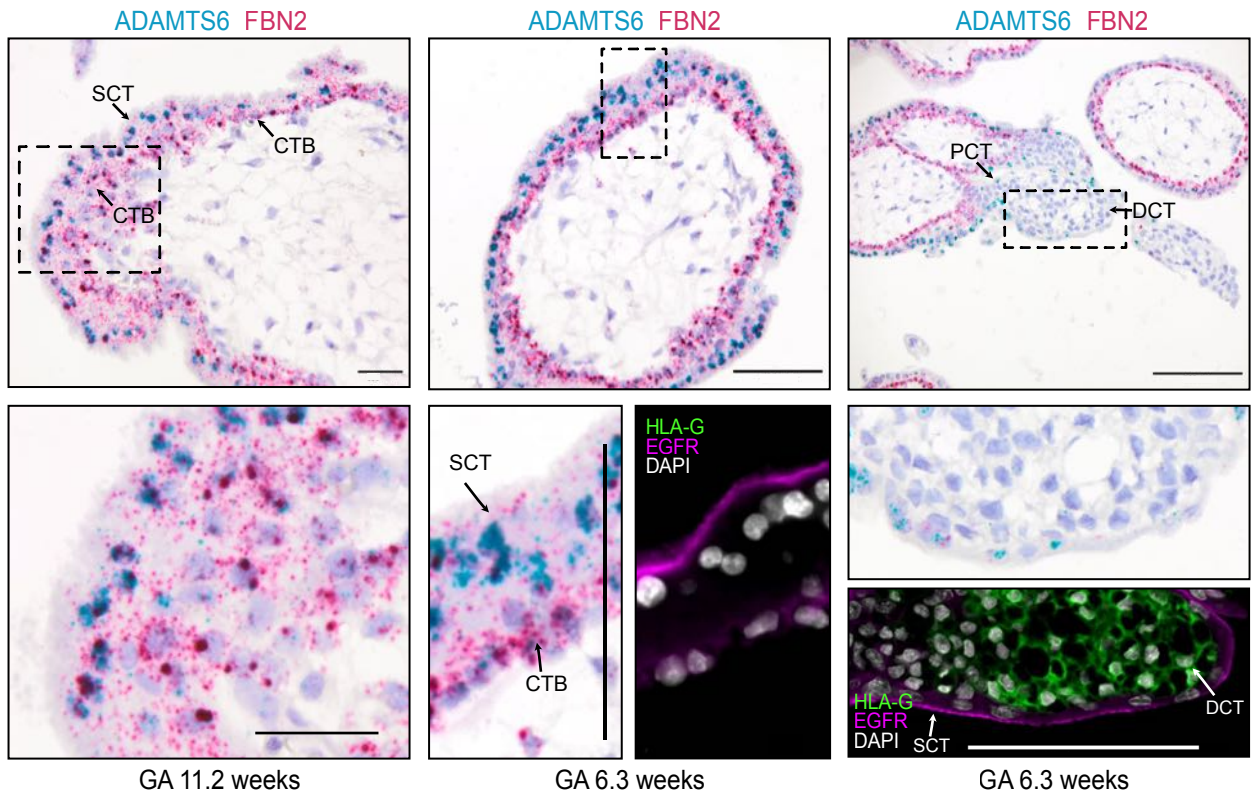

861 **SUPPLEMENTAL FIGURE LEGENDS**

862 **Supplemental Figure 1:**

863 (A) Uniform Manifold Approximation Projection (UMAP) of 7789 captured trophoblasts incl. 8 trophoblast  
864 clusters: CTB1-4, EVT, cCTB1-2, SCTp. (B) Feature plots denoting gene expression cluster specificity of  
865 key trophoblast markers.

866

867 **Supplemental Figure 2:**

868 (A) Representative IF image showing polyclonal rabbit IgG signal in chorionic anchoring and floating villi.  
869 Shown are proximal column trophoblasts (PCT), distal column trophoblasts (DCT), cytotrophoblasts (CTB)  
870 and syncytiotrophoblasts (SCT). Bar = 100  $\mu$ m. (B) UMAP plot with monocle 3 trajectory graph overlain.  
871 Relative pseudotime values are color coordinated.

872

873 **Supplemental Figure 3:**

874 (A) Relative expression of 11 identified CTB proteases across pseudotime towards either the mature EVT  
875 (solid line) or SCT states (dashed line). Corresponding cell clusters are marked by colour. Trophoblast  
876 lineage specific genes *HLA-G* (EVT), *TEAD4* (CTB), and *ERVFRD-1* (SCT) are included.

877

878 **Supplemental Figure 4:**

879 (A) “Elastic fibre formation” pathway colored with gradient (red) indicating proportion (%) of cells  
880 expressing specific genes in CTB clusters 1-4.

881
